# Supplementary material
Source: MDPI journal article supplement (https://www.mdpi.com/search?q=genes-02-00925)
Supplement: s001 [file genes-11341-Supplement Tables S1 & S2 & S3.xlsx]

## Sheet: Table S1
			TRANSCRIPT								LEFT_FLANKING_GENE						OVERLAPPING_GENE1						OVERLAPPING_GENE2						RIGHT_FLANKING_GENE						PROTEIN_HOMOLOGY
	RFM	taxonomy_group	sRNA_ID	start	stop	strand	accession	organism	tax_id	replicon_name	start	stop	strand	locus_tag	region_type	protein	start	stop	strand	locus_tag	region_type	protein	start	stop	strand	locus_tag	region_type	protein	start	stop	strand	locus_tag	region_type	protein	LF_GENE	OV_GENE1	OV_GENE2	RG_GENE
1	SmelA001	Rhizobiaceae	SmelA001	1002	1054	+	NC_003037	Sinorhizobium meliloti 1021	266834	plasmid pSymA	1352360	1353535	-	SMa2395	CDS	RepA2 replication protein													1353	4457	+	SMa0002	CDS	FdoG formate dehydrogenase-O alpha subunit				ORF1
	SmelA001	Rhizobiaceae	RNA1	321178	321231	+	CP002741	Sinorhizobium meliloti BL225C	698936	plasmid pSINMEB01	318350	319495	-	SinmeB_5387	CDS	plasmid partitioning protein RepA													321545	324634	+	SinmeB_5388	CDS	formate dehydrogenase, alpha subunit	ORF2			ORF1
	SmelA001	Rhizobiaceae	RNA2	224036	224089	-	NC_015591	Sinorhizobium meliloti AK83	693982	chromosome 3	220634	223738	-	Sinme_5505	CDS	formate dehydrogenase subunit alpha													225560	225724	+	Sinme_5506	CDS	hypothetical protein	ORF1			ORF3
2	SmelA003	Rhizobiaceae	SmelA003	15179	15268	+	NC_003037	Sinorhizobium meliloti 1021	266834	plasmid pSymA	14450	15094	-	SMa0021	CDS	hypothetical protein													15716	15807	+	SMa0022	tRNA	tRNA-Sec	ORF1			ORF2
	SmelA003	Rhizobiaceae	RNA1	334303	334393	+	CP002741	Sinorhizobium meliloti BL225C	698936	plasmid pSINMEB01	333502	333978	-	SinmeB_5399	CDS	response regulator receiver													334420	334605	+	SinmeB_5400	CDS	hypothetical protein	ORF1			ORF3
	SmelA003	Rhizobiaceae	RNA2	522811	522905	-	CP002741	Sinorhizobium meliloti BL225C	698936	plasmid pSINMEB01	522224	522565	+	SinmeB_5604	CDS	protein of unknown function DUF1515	522706	523245	-	SinmeB_5605	CDS	hypothetical protein							523705	523878	+	SinmeB_5607	CDS	Protein of unknown function DUF3606	ORF4	ORF3		ORF5
	SmelA003	Rhizobiaceae	RNA3	157480	157570	-	CP002741	Sinorhizobium meliloti BL225C	698936	plasmid pSINMEB01	156440	156667	+	SinmeB_5228	CDS	hypothetical protein													158004	158327	+	SinmeB_5230	CDS	thioredoxin	ORF6			ORF7
	SmelA003	Rhizobiaceae	RNA4	1520324	1520414	+	CP002740	Sinorhizobium meliloti BL225C	698936	chromosome	1518974	1519876	+	SinmeB_1461	CDS	transcriptional regulator, LysR family													1521183	1521443	+	SinmeB_1462	CDS	hypothetical protein	ORF8			ORF9
	SmelA003	Rhizobiaceae	RNA5	1620868	1620958	+	NC_015590	Sinorhizobium meliloti AK83	693982	chromosome 1	1619518	1620420	+	Sinme_1616	CDS	LysR family transcriptional regulator													1621727	1621987	+	Sinme_1617	CDS	hypothetical protein	ORF8			ORF9
	SmelA003	Rhizobiaceae	RNA6	303653	303744	-	NC_015590	Sinorhizobium meliloti AK83	693982	chromosome 1	303442	303627	-	Sinme_0288	CDS	hypothetical protein													304293	305363	-	Sinme_0289	CDS	Redoxin domain-containing protein	ORF3			ORF10
	SmelA003	Rhizobiaceae	RNA7|SmelC441	1853726	1853816	+	NC_003047	Sinorhizobium meliloti 1021	266834	chromosome	1853311	1853481	+	SMc00284	CDS	hypothetical protein													1853931	1855270	+		repeat_region		ORF3			ORF11
	SmelA003	Rhizobiaceae	RNA8	662033	662127	+	CP002742	Sinorhizobium meliloti BL225C	698936	plasmid pSINMEB02	661485	661934	+	SinmeB_4056	CDS	hypothetical protein													662185	662355	+	SinmeB_4057	CDS	hypothetical protein	ORF12			ORF13
	SmelA003	Rhizobiaceae	RNA9	381053	381143	+	NC_015591	Sinorhizobium meliloti AK83	693982	chromosome 3	380296	380619	-	Sinme_5655	CDS	thioredoxin													381966	382193	-	Sinme_5657	CDS	hypothetical protein	ORF7			ORF6
	SmelA003	Rhizobiaceae	RNA10	650455	650549	-	NC_003078	Sinorhizobium meliloti 1021	266834	plasmid pSymB	649719	649880	-	SM_b21028	CDS	hypothetical protein	649978	650502	+	SM_b21029	CDS	hypothetical protein							650647	651096	-	SM_b21030	CDS	hypothetical protein	ORF14	ORF15		ORF12
	SmelA003	Rhizobiaceae	RNA11	1471755	1471849	+	NC_015596	Sinorhizobium meliloti AK83	693982	chromosome 2	1471201	1471650	+	Sinme_5069	CDS	hypothetical protein													1472447	1472608	+	Sinme_5070	CDS	hypothetical protein	ORF12			ORF14
	SmelA003	Rhizobiaceae	RNA12|SmelB046	544709	544798	-	NC_003078	Sinorhizobium meliloti 1021	266834	plasmid pSymB	543981	544349	+	SM_b20519	CDS	hypothetical protein													546127	546684	+	SM_b20520	CDS	hypothetical protein	ORF4			ORF16
	SmelA003	Rhizobiaceae	RNA13	1345087	1345180	-	NC_009620	Sinorhizobium medicae WSM419	366394	plasmid pSMED01	1344843	1345037	-	Smed_4829	CDS	hypothetical protein													1345338	1345733	+	Smed_4830	CDS	response regulator receiver protein	ORF3			ORF1
	SmelA003	Rhizobiaceae	RNA14	1736453	1736544	+	CP002740	Sinorhizobium meliloti BL225C	698936	chromosome	1735603	1735776	-	SinmeB_1665	CDS	Protein of unknown function DUF3606													1737046	1737411	-	SinmeB_1666	CDS	hypothetical protein	ORF5			ORF17
	SmelA003	Rhizobiaceae	RNA15	1938883	1938969	+	NC_009636	Sinorhizobium medicae WSM419	366394	chromosome	1937283	1938443	+	Smed_1864	CDS	alkyl hydroperoxide reductase/ Thiol specific antioxidant/ Mal allergen													1939190	1939555	-	Smed_1865	CDS	hypothetical protein	ORF10			ORF17
	SmelA003	Rhizobiaceae	RNA16	1034053	1034143	-	NC_015590	Sinorhizobium meliloti AK83	693982	chromosome 1	1033383	1033658	-	Sinme_1024	CDS	hypothetical protein													1034313	1034579	+	Sinme_1025	CDS	hypothetical protein	ORF18			ORF19
	SmelA003	Rhizobiaceae	RNA17	898615	898705	-	CP002740	Sinorhizobium meliloti BL225C	698936	chromosome	897944	898219	-	SinmeB_0853	CDS	hypothetical protein													898875	899147	+	SinmeB_0854	CDS	hypothetical protein	ORF18			ORF19
	SmelA003	Rhizobiaceae	RNA18	1334096	1334186	-	NC_003047	Sinorhizobium meliloti 1021	266834	chromosome	1332898	1332974	+	SMc02182	tRNA	tRNA-Pro													1334356	1334628	+	SMc01789	CDS	putative signal peptide protein	ORF20			ORF19
	SmelA003	Rhizobiaceae	RNA19	833830	833918	+	CP002741	Sinorhizobium meliloti BL225C	698936	plasmid pSINMEB01	832204	832476	+	SinmeB_5906	CDS	cold-shock DNA-binding domain protein													835268	835513	+	SinmeB_5911	CDS	hypothetical protein	ORF21			ORF6
	SmelA003	Rhizobiaceae	RNA20	1334178	1334268	+	NC_003078	Sinorhizobium meliloti 1021	266834	plasmid pSymB	1332769	1333932	+	SM_b21402	CDS	hypothetical protein													1335358	1335813	+	SM_b21403	CDS	hypothetical protein	ORF22			ORF23
	SmelA003	Rhizobiaceae	RNA21	1645167	1645257	-	CP002742	Sinorhizobium meliloti BL225C	698936	plasmid pSINMEB02	1642757	1643953	-	SinmeB_4994	CDS	transposase mutator type													1645503	1646666	-	SinmeB_4998	CDS	Hemolysin-type calcium-binding region	ORF11			ORF22
	SmelA003	Rhizobiaceae	RNA22	2696991	2697081	+	NC_009636	Sinorhizobium medicae WSM419	366394	chromosome	2695628	2696659	+	Smed_2599	CDS	AraC family transcriptional regulator													2697466	2697542	-	Smed_R0043	tRNA	tRNA-Met	ORF24			ORF25
	SmelA003	Rhizobiaceae	RNA23	834722	834812	-	NC_015596	Sinorhizobium meliloti AK83	693982	chromosome 2	833183	833431	-	Sinme_4492	CDS	hypothetical protein													834898	835158	+	Sinme_4494	CDS	hypothetical protein	ORF23			ORF26
	SmelA003	Rhizobiaceae	RNA24	1456608	1456698	-	NC_009636	Sinorhizobium medicae WSM419	366394	chromosome	1456374	1456568	-	Smed_1376	CDS	hypothetical protein													1456913	1457131	+	Smed_1377	CDS	putative signal peptide protein	ORF27			ORF19
	SmelA003	Rhizobiaceae	RNA25	380943	381033	-	NC_009636	Sinorhizobium medicae WSM419	366394	chromosome	380277	380921	+	Smed_0355	CDS	hypothetical protein													381192	381560	+	Smed_0356	CDS	hypothetical protein	ORF28			ORF29
	SmelA003	Rhizobiaceae	RNA26	471588	471682	-	NC_015590	Sinorhizobium meliloti AK83	693982	chromosome 1	470919	471563	+	Sinme_0456	CDS	SMP-30/gluconolaconase/LRE-like region-containing protein													471837	472205	+	Sinme_0457	CDS	hypothetical protein	ORF28			ORF29
	SmelA003	Rhizobiaceae	RNA27|SmelC144	824933	825027	-	NC_003047	Sinorhizobium meliloti 1021	266834	chromosome	824264	824908	+	SMc00805	CDS	hypothetical protein													825182	825550	+	SMc00806	CDS	hypothetical protein	ORF28			ORF29
	SmelA003	Rhizobiaceae	RNA28	387791	387885	-	CP002740	Sinorhizobium meliloti BL225C	698936	chromosome	387122	387766	+	SinmeB_0361	CDS	SMP-30/Gluconolaconase/LRE-like region-containing protein													388040	388408	+	SinmeB_0362	CDS	protein of unknown function DUF1236	ORF28			ORF29
3	SmelA014	Rhizobiaceae	SmelA014	206669	206772	+	NC_003037	Sinorhizobium meliloti 1021	266834	plasmid pSymA	204990	206588	+	SMa0383	CDS	hypothetical protein													207549	208846	-		repeat_region		ORF1			ORF2
	SmelA014	Rhizobiaceae	RNA1	1401264	1401367	-	CP002741	Sinorhizobium meliloti BL225C	698936	plasmid pSINMEB01	1401035	1401157	+	SinmeB_6493	CDS	hypothetical protein													1401448	1403046	-	SinmeB_6494	CDS	protein of unknown function DUF894 DitE	ORF3			ORF1
4	SmelA018	Rhizobiaceae	SmelA018	234850	234939	-	NC_003037	Sinorhizobium meliloti 1021	266834	plasmid pSymA	234248	234631	-	SMa0436	CDS	hypothetical protein													236016	236381	+	SMa5022	CDS	hypothetical protein	ORF1			ORF2
	SmelA018	Rhizobiaceae	RNA1	1468743	1468833	+	CP002741	Sinorhizobium meliloti BL225C	698936	plasmid pSINMEB01	1467951	1468202	+	SinmeB_6571	CDS	hypothetical protein													1469050	1470111	+	SinmeB_6572	CDS	signal transduction histidine kinase	ORF3			ORF1
	SmelA018	Rhizobiaceae	RNA2	15953	16043	+	NC_015591	Sinorhizobium meliloti AK83	693982	chromosome 3	15162	15413	+	Sinme_5293	CDS	hypothetical protein													17558	18082	-	Sinme_5295	CDS	bifunctional deaminase-reductase domain-containing protein	ORF3			ORF4
5	SmelA019	Rhizobiaceae	SmelA019	235259	235355	+	NC_003037	Sinorhizobium meliloti 1021	266834	plasmid pSymA	234248	234631	-	SMa0436	CDS	hypothetical protein													236016	236381	+	SMa5022	CDS	hypothetical protein	ORF1			ORF2
	SmelA019	Rhizobiaceae	RNA1	15537	15633	-	NC_015591	Sinorhizobium meliloti AK83	693982	chromosome 3	15162	15413	+	Sinme_5293	CDS	hypothetical protein													17558	18082	-	Sinme_5295	CDS	bifunctional deaminase-reductase domain-containing protein	ORF3			ORF4
	SmelA019	Rhizobiaceae	RNA2	1468326	1468423	-	CP002741	Sinorhizobium meliloti BL225C	698936	plasmid pSINMEB01	1467951	1468202	+	SinmeB_6571	CDS	hypothetical protein													1469050	1470111	+	SinmeB_6572	CDS	signal transduction histidine kinase	ORF3			ORF1
6	SmelA020	Rhizobiaceae	SmelA020	235393	235497	-	NC_003037	Sinorhizobium meliloti 1021	266834	plasmid pSymA	234248	234631	-	SMa0436	CDS	hypothetical protein													236016	236381	+	SMa5022	CDS	hypothetical protein	ORF1			ORF2
	SmelA020	Rhizobiaceae	RNA1	15396	15501	+	NC_015591	Sinorhizobium meliloti AK83	693982	chromosome 3	14503	14868	-	Sinme_5292	CDS	hypothetical protein	15162	15413	+	Sinme_5293	CDS	hypothetical protein							17558	18082	-	Sinme_5295	CDS	bifunctional deaminase-reductase domain-containing protein	ORF2	ORF3		ORF4
	SmelA020	Rhizobiaceae	RNA2	1468185	1468290	+	CP002741	Sinorhizobium meliloti BL225C	698936	plasmid pSINMEB01	1466881	1467297	-	SinmeB_6569	CDS	hypothetical protein	1467951	1468202	+	SinmeB_6571	CDS	hypothetical protein							1469050	1470111	+	SinmeB_6572	CDS	signal transduction histidine kinase	ORF2	ORF3		ORF1
7	SmelA022	Rhizobiaceae	SmelA022	289293	289457	-	NC_003037	Sinorhizobium meliloti 1021	266834	plasmid pSymA	288341	288703	+	SMa0538	CDS	hypothetical protein													289833	290228	+	SMa0541	CDS	hypothetical protein	ORF1			ORF2
	SmelA022	Rhizobiaceae	RNA1	1345035	1345200	+	CP002741	Sinorhizobium meliloti BL225C	698936	plasmid pSINMEB01	1344263	1344658	-	SinmeB_6430	CDS	PRC-barrel domain protein	1345053	1345313	+	SinmeB_6431	CDS	hypothetical protein							1345785	1346147	-	SinmeB_6432	CDS	hypothetical protein	ORF2	ORF3		ORF1
8	SmelA033	Rhizobiaceae	SmelA033	512141	512223	-	NC_003037	Sinorhizobium meliloti 1021	266834	plasmid pSymA	511757	512080	+	SMa0922	CDS	hypothetical protein													513088	515007	-	SMa0929	CDS	conjugal transfer coupling protein TraG	ORF1			ORF2
	SmelA033	Rhizobiaceae	RNA1	1005918	1006001	-	CP002741	Sinorhizobium meliloti BL225C	698936	plasmid pSINMEB01	1004627	1004869	-	SinmeB_6091	CDS	hypothetical protein													1006192	1006368	+	SinmeB_6093	CDS	hypothetical protein	ORF3			ORF4
	SmelA033	Rhizobiaceae	RNA2	511897	511980	-	NC_015591	Sinorhizobium meliloti AK83	693982	chromosome 3	511514	511837	+	Sinme_5805	CDS	hypothetical protein													512180	512356	+	Sinme_5806	CDS	hypothetical protein	ORF1			ORF4
	SmelA033	Rhizobiaceae	RNA3	177819	177904	-	NC_004041	Rhizobium etli CFN 42	347834	plasmid symbiotic plasmid p42d	177292	177756	+	RHE_PD00161	CDS	hypothetical protein													178350	178655	-	RHE_PD00162	CDS	hypothetical protein	ORF1			ORF5
	SmelA033	Rhizobiaceae	RNA4	192026	192109	-	NC_010996	Rhizobium etli CIAT 652	491916	plasmid pB	191502	191963	+	RHECIAT_PB0000177	CDS	hypothetical protein													192277	192618	-	RHECIAT_PB0000178	CDS	hypothetical protein	ORF1			ORF5
9	SmelA054	Rhizobiaceae	SmelA054	911298	911397	+	NC_003037	Sinorhizobium meliloti 1021	266834	plasmid pSymA	910181	910639	-	SMa1635	CDS	hypothetical protein													911646	913318	+		repeat_region		ORF1			ORF2
	SmelA054	Rhizobiaceae	RNA1	1317774	1317874	+	CP002741	Sinorhizobium meliloti BL225C	698936	plasmid pSINMEB01	1316657	1316998	-	SinmeB_6400	CDS	hypothetical protein													1318265	1319599	+	SinmeB_6401	CDS	transposase IS4 family protein	ORF1			ORF2
	SmelA054	Rhizobiaceae	RNA2	797129	797229	+	NC_015591	Sinorhizobium meliloti AK83	693982	chromosome 3	796012	796353	-	Sinme_6082	CDS	hypothetical protein													797669	799003	-	Sinme_6083	CDS	transposase IS4 family protein	ORF1			ORF2
10	SmelA056	Rhizobiaceae	SmelA056	954434	954620	-	NC_003037	Sinorhizobium meliloti 1021	266834	plasmid pSymA	952528	953982	+	SMa1691	CDS	Cation transport ATPase													954759	955475	-	SMa5033	CDS	hypothetical protein	ORF1			ORF2
	SmelA056	Rhizobiaceae	RNA1	1531588	1531775	-	CP002741	Sinorhizobium meliloti BL225C	698936	plasmid pSINMEB01	1529710	1531137	+	SinmeB_6627	CDS	cation transporter													1532744	1533940	+	SinmeB_6629	CDS	signal transduction histidine kinase	ORF1			ORF3
	SmelA056	Rhizobiaceae	RNA2	840251	840438	-	NC_015591	Sinorhizobium meliloti AK83	693982	chromosome 3	838373	839800	+	Sinme_6119	CDS	cation transporter													841408	842604	+	Sinme_6121	CDS	signal transduction histidine kinase	ORF1			ORF3
11	SmelA075	Rhizobiaceae	SmelA075	1220694	1220810	+	NC_003037	Sinorhizobium meliloti 1021	266834	plasmid pSymA	1219615	1220355	+	SMa2165	CDS	short chain													1221480	1221947	+	SMa2167	CDS	hypothetical protein	ORF1			ORF2
	SmelA075	Rhizobiaceae	RNA1	172173	172290	+	NC_015597	Sinorhizobium meliloti AK83	693982	plasmid pSINME01	171097	171837	+	Sinme_6793	CDS	3-oxoacyl-(acyl-carrier-protein) reductase													172524	172853	-	Sinme_6794	CDS	hypothetical protein	ORF1			ORF3
	SmelA075	Rhizobiaceae	RNA2	3479595	3479712	-	CP002740	Sinorhizobium meliloti BL225C	698936	chromosome	3478596	3479519	-	SinmeB_3284	CDS	protein of unknown function DUF6 transmembrane													3479980	3482283	+	SinmeB_3285	CDS	penicillin-binding protein, 1A family	ORF4			ORF5
	SmelA075	Rhizobiaceae	RNA3	3626924	3627041	-	NC_015590	Sinorhizobium meliloti AK83	693982	chromosome 1	3625925	3626848	-	Sinme_3507	CDS	hypothetical protein													3627309	3629612	+	Sinme_3508	CDS	penicillin-binding protein 1A family	ORF4			ORF5
	SmelA075	Rhizobiaceae	RNA4|SmelC025	206859	206976	-	NC_003047	Sinorhizobium meliloti 1021	266834	chromosome	205860	206783	-	SMc02855	CDS	hypothetical protein													207244	209547	+	SMc02856	CDS	putative penicillin-binding protein	ORF4			ORF5
	SmelA075	Rhizobiaceae	RNA5	3590296	3590413	-	NC_009636	Sinorhizobium medicae WSM419	366394	chromosome	3589318	3590205	-	Smed_3386	CDS	hypothetical protein													3590494	3590925	-	Smed_3387	CDS	pyrimidine dimer DNA glycosylase	ORF4			ORF6
	SmelA075	Rhizobiaceae	RNA6	3720583	3720703	+	NC_012587	Sinorhizobium fredii NGR234	394	chromosome	3718015	3720336	-	NGR_c35080	CDS	penicillin-binding protein, 1A family	3720525	3721688	+	NGR_c35090	CDS	putative transmembrane protein							3721900	3722382	+	NGR_c35100	CDS	hypothetical protein	ORF5	ORF4		ORF7
	SmelA075	Rhizobiaceae	RNA7	109376	109495	+	NC_015183	Agrobacterium sp. H13-3	861208	chromosome	108794	109252	-	AGROH133_02958	CDS	hypothetical protein	109262	109456	-	AGROH133_02959	CDS	hypothetical protein							109733	109942	+	AGROH133_02961	CDS	cold shock protein	ORF8	ORF9		ORF10
	SmelA075	Rhizobiaceae	RNA8	109477	109596	+	NC_003062	Agrobacterium tumefaciens str. C58	176299	chromosome circular	108895	109353	-	Atu0104	CDS	hypothetical protein	109363	109557	-	Atu0105	CDS	hypothetical protein							109823	110032	+	Atu0106	CDS	cold shock protein	ORF8	ORF9		ORF10
	SmelA075	Rhizobiaceae	RNA9	1615159	1615278	+	NC_015508	Agrobacterium sp. H13-3	861208	chromosome linear	1614286	1615035	+	AGROH133_12938	CDS	serine dehydrogenase	1615057	1615386	+	AGROH133_12939	CDS	hypothetical protein							1615591	1616778	+	AGROH133_12940	CDS	proline dipeptidase	ORF11	ORF4		ORF12
	SmelA075	Rhizobiaceae	RNA10	1230301	1230420	+	NC_003063	Agrobacterium tumefaciens str. C58	176299	chromosome linear	1229427	1230176	+	Atu4110	CDS	serine dehydrogenase	1230231	1230494	+	Atu4111	CDS	hypothetical protein							1230719	1231906	+	Atu4112	CDS	proline dipeptidase	ORF11	ORF4		ORF12
	SmelA075	Rhizobiaceae	RNA11	513999	514116	+	NC_010994	Rhizobium etli CIAT 652	491916	chromosome	512732	513613	+	RHECIAT_CH0000515	CDS	probable oxidoreductase protein	513699	514148	+	RHECIAT_CH0000516	CDS	hypothetical protein							514221	515498	+	RHECIAT_CH0000517	CDS	hypothetical protein	ORF13	ORF4		ORF14
	SmelA075	Rhizobiaceae	RNA12	98056	98173	+	NC_011369	Rhizobium leguminosarum bv. trifolii WSM2304	395492	chromosome	96796	97677	+	Rleg2_0104	CDS	aldo/keto reductase													98282	99559	+	Rleg2_0105	CDS	protein of unknown function DUF900 hydrolase family protein	ORF13			ORF14
	SmelA075	Rhizobiaceae	RNA13	462572	462689	+	NC_007761	Rhizobium etli CFN 42	347834	chromosome	461301	462182	+	RHE_CH00449	CDS	oxidoreductase protein													462794	464071	+	RHE_CH00450	CDS	hypothetical protein	ORF13			ORF14
	SmelA075	Rhizobiaceae	RNA14	4444892	4445012	-	NC_010994	Rhizobium etli CIAT 652	491916	chromosome	4444289	4444867	+	RHECIAT_CH0004359	CDS	nicotinic acid mononucleotide adenylyltransferase													4445118	4445327	-	RHECIAT_CH0004360	CDS	hypothetical protein	ORF15			ORF16
	SmelA075	Rhizobiaceae	RNA15	597907	598024	+	NC_011985	Agrobacterium radiobacter K84	311403	chromosome 1	596785	597666	+	Arad_0725	CDS	oxidoreductase protein													598187	599503	+	Arad_0727	CDS	hypothetical protein	ORF13			ORF14
	SmelA075	Rhizobiaceae	RNA16	107069	107186	+	NC_012850	Rhizobium leguminosarum bv. trifolii WSM1325	395491	chromosome	105825	106706	+	Rleg_0114	CDS	aldo/keto reductase													107377	108654	+	Rleg_0115	CDS	hypothetical protein	ORF13			ORF14
	SmelA075	Rhizobiaceae	RNA17	512664	512781	+	NC_008380	Rhizobium leguminosarum bv. viciae 3841	216596	chromosome	511376	512272	+	RL0474	CDS	aldo-keto reductase													512816	513202	-	RL0475	CDS	hypothetical protein	ORF13			ORF17
	SmelA075	Rhizobiaceae	RNA18	1369798	1369918	-	NC_015590	Sinorhizobium meliloti AK83	693982	chromosome 1	1369047	1369190	-	Sinme_1347	CDS	hypothetical protein	1369434	1369994	-	Sinme_1348	CDS	hypothetical protein							1370668	1370752	+	Sinme_R0020	tRNA	tRNA-Leu	ORF18	ORF4		ORF19
	SmelA075	Rhizobiaceae	RNA19	4988036	4988154	-	NC_008380	Rhizobium leguminosarum bv. viciae 3841	216596	chromosome	4987413	4988012	+	RL4684	CDS	nicotinic acid mononucleotide adenylyltransferase													4988507	4989298	+	RL4685	CDS	solute-binding component of ABC transporter	ORF15			ORF20
	SmelA075	Rhizobiaceae	RNA20	3945515	3945634	-	NC_011985	Agrobacterium radiobacter K84	311403	chromosome 1	3944888	3945469	+	Arad_4880	CDS	nicotinic acid mononucleotide adenylyltransferase	3945517	3945657	+	Arad_4881	CDS	hypothetical protein							3946044	3946844	+	Arad_4883	CDS	molybdate ABC transporter, periplasmic molybdate-binding protein	ORF15	ORF9		ORF20
	SmelA075	Rhizobiaceae	RNA21	1231898	1232018	-	CP002740	Sinorhizobium meliloti BL225C	698936	chromosome	1231144	1231287	-	SinmeB_1177	CDS	protein of unknown function DUF1127													1232766	1232850	+	SinmeB_R0020	tRNA	tRNA-Leu	ORF18			ORF19
	SmelA075	Rhizobiaceae	RNA22|SmelC397	1667489	1667609	-	NC_003047	Sinorhizobium meliloti 1021	266834	chromosome	1667262	1667434	-		repeat_region														1668357	1668441	+	SMc02125	tRNA	tRNA-Leu	ORF4			ORF19
	SmelA075	Rhizobiaceae	RNA23	7323	7439	+	NC_011984	Agrobacterium vitis S4	311402	plasmid pAtS4c	6113	7192	+	Avi_9007	CDS	two component sensor kinase													7500	8633	-	Avi_9008	CDS	phage integrase family protein	ORF21			ORF22
	SmelA075	Rhizobiaceae	RNA24	4314382	4314500	-	NC_007761	Rhizobium etli CFN 42	347834	chromosome	4313781	4314359	+	RHE_CH04070	CDS	nicotinic acid mononucleotide adenylyltransferase													4314798	4315589	+	RHE_CH04071	CDS	molybdenum ABC transporter, substrate-binding protein	ORF15			ORF20
	SmelA075	Rhizobiaceae	RNA25	4296630	4296745	-	NC_012850	Rhizobium leguminosarum bv. trifolii WSM1325	395491	chromosome	4295976	4296575	+	Rleg_4201	CDS	nicotinic acid mononucleotide adenylyltransferase													4297098	4297889	+	Rleg_4202	CDS	molybdenum ABC transporter, periplasmic molybdate-binding protein	ORF15			ORF20
	SmelA075	Rhizobiaceae	RNA26	4019324	4019442	-	NC_011369	Rhizobium leguminosarum bv. trifolii WSM2304	395492	chromosome	4018721	4019299	+	Rleg2_3877	CDS	nicotinic acid mononucleotide adenylyltransferase													4019781	4020572	+	Rleg2_3878	CDS	molybdenum ABC transporter, periplasmic molybdate-binding protein	ORF15			ORF20
	SmelA075	Rhizobiaceae	RNA27	1258036	1258156	-	NC_009636	Sinorhizobium medicae WSM419	366394	chromosome	1257614	1257814	-	Smed_1180	CDS	hypothetical protein													1258759	1258843	+	Smed_R0020	tRNA	tRNA-Leu	ORF18			ORF19
	SmelA075	Phyllobacteriaceae	RNA28	1916698	1916819	+	NC_008254	Mesorhizobium sp. BNC1	266779	chromosome	1916546	1916686	+	Meso_1791	CDS	hypothetical protein	1916819	1918300	+	Meso_1792	CDS	tRNA (uracil-5-)-methyltransferase Gid							1918307	1920064	-	Meso_1793	CDS	hypothetical protein	ORF18	ORF23		ORF24
	SmelA075	Rhizobiaceae	RNA29	1912476	1912590	-	NC_010994	Rhizobium etli CIAT 652	491916	chromosome	1911937	1912446	+	RHECIAT_CH0001925	CDS	hypothetical protein													1912923	1914026	+	RHECIAT_CH0001926	CDS	hypothetical conserved membrane protein	ORF25			ORF26
	SmelA075	Rhizobiaceae	RNA30|SmelB161	1605829	1605944	+	NC_003078	Sinorhizobium meliloti 1021	266834	plasmid pSymB	1605382	1605705	-	SM_b20590	CDS	acylphosphatase	1605767	1606063	-	SM_b20591	CDS	hypothetical protein							1606089	1606772	+	SM_b20592	CDS	RNA polymerase sigma factor	ORF27	ORF9		ORF28
	SmelA075	Rhizobiaceae	RNA31	1697036	1697149	-	NC_012850	Rhizobium leguminosarum bv. trifolii WSM1325	395491	chromosome	1696657	1696803	-	Rleg_1700	CDS	hypothetical protein													1697482	1698585	+	Rleg_1701	CDS	hypothetical protein	ORF18			ORF26
	SmelA075	Phyllobacteriaceae	RNA32	3977084	3977203	-	NC_008254	Mesorhizobium sp. BNC1	266779	chromosome	3975340	3976962	-	Meso_3687	CDS	alpha amylase, catalytic region													3977363	3978682	+	Meso_3688	CDS	homoserine dehydrogenase, NAD-binding	ORF29			ORF30
	SmelA075	Rhizobiaceae	RNA33	1434169	1434289	-	NC_012587	Sinorhizobium fredii NGR234	394	chromosome	1433785	1433985	-	NGR_c13890	CDS	hypothetical protein													1434843	1434925	-	NGR_c13910	tRNA	tRNA-Leu	ORF18			ORF31
	SmelA075	Rhizobiaceae	RNA34	1926237	1926351	-	NC_007761	Rhizobium etli CFN 42	347834	chromosome	1925699	1926187	+	RHE_CH01838	CDS	hypothetical protein													1926684	1927778	+	RHE_CH01839	CDS	hypothetical protein	ORF25			ORF26
	SmelA075	Rhizobiaceae	RNA35	1534499	1534615	-	NC_011369	Rhizobium leguminosarum bv. trifolii WSM2304	395492	chromosome	1533929	1534075	-	Rleg2_1502	CDS	protein of unknown function DUF1127													1534947	1536050	+	Rleg2_1503	CDS	conserved hypothetical conserved membrane protein	ORF18			ORF26
	SmelA075	Phyllobacteriaceae	RNA36	3675195	3675313	-	NC_014923	Mesorhizobium ciceri biovar biserrulae WSM1271	765698	chromosome	3673344	3674753	-	Mesci_3513	CDS	gid protein													3675321	3675461	-	Mesci_3514	CDS	hypothetical protein	ORF23			ORF18
	SmelA075	Rhizobiaceae	RNA37	1693284	1693402	-	NC_011985	Agrobacterium radiobacter K84	311403	chromosome 1	1692677	1692823	-	Arad_2144	CDS	hypothetical protein													1693731	1694870	+	Arad_2145	CDS	hypothetical protein	ORF18			ORF26
	SmelA075	Rhizobiaceae	RNA38	115130	115251	+	NC_011989	Agrobacterium vitis S4	311402	chromosome 1	113190	114716	-	Avi_0122	CDS	sulfatase protein	114968	115156	-	Avi_0125	CDS	hypothetical protein							115395	116840	+	Avi_0126	CDS	phosphomannomutase	ORF32	ORF9		ORF33
	SmelA075	Rhizobiaceae	RNA39	1434461	1434582	-	NC_012587	Sinorhizobium fredii NGR234	394	chromosome	1433785	1433985	-	NGR_c13890	CDS	hypothetical protein													1434843	1434925	-	NGR_c13910	tRNA	tRNA-Leu	ORF18			ORF31
	SmelA075	Rhizobiaceae	RNA40	574043	574158	-	NC_015596	Sinorhizobium meliloti AK83	693982	chromosome 2	573216	573899	-	Sinme_4238	CDS	ECF subfamily RNA polymerase sigma-24 subunit													574319	574603	+	Sinme_4239	CDS	acylphosphatase	ORF28			ORF27
	SmelA075	Rhizobiaceae	RNA41	1376420	1376535	-	CP002742	Sinorhizobium meliloti BL225C	698936	plasmid pSINMEB02	1375593	1376276	-	SinmeB_4732	CDS	RNA polymerase, sigma-24 subunit, ECF subfamily													1376696	1376980	+	SinmeB_4733	CDS	acylphosphatase	ORF28			ORF27
	SmelA075	Rhizobiaceae	RNA42	2174954	2175070	-	NC_008380	Rhizobium leguminosarum bv. viciae 3841	216596	chromosome	2172416	2173849	-	RL2059	CDS	tRNA (uracil-5-)-methyltransferase Gid													2175400	2176503	+	RL2060	CDS	transmembrane protein	ORF23			ORF26
	SmelA075	Rhizobiaceae	RNA43	679041	679156	-	NC_009620	Sinorhizobium medicae WSM419	366394	plasmid pSMED01	678214	678885	-	Smed_4197	CDS	RNA polymerase sigma factor													679315	679599	+	Smed_4198	CDS	acylphosphatase	ORF28			ORF27
	SmelA075	Rhizobiaceae	RNA44	1370076	1370196	-	NC_015590	Sinorhizobium meliloti AK83	693982	chromosome 1	1369434	1369994	-	Sinme_1348	CDS	hypothetical protein													1370668	1370752	+	Sinme_R0020	tRNA	tRNA-Leu	ORF4			ORF19
	SmelA075	Rhizobiaceae	RNA45|SmelC398	1667767	1667887	-	NC_003047	Sinorhizobium meliloti 1021	266834	chromosome	1667262	1667434	-		repeat_region														1668357	1668441	+	SMc02125	tRNA	tRNA-Leu	ORF4			ORF19
	SmelA075	Rhizobiaceae	RNA46	1232176	1232296	-	CP002740	Sinorhizobium meliloti BL225C	698936	chromosome	1231144	1231287	-	SinmeB_1177	CDS	protein of unknown function DUF1127													1232766	1232850	+	SinmeB_R0020	tRNA	tRNA-Leu	ORF18			ORF19
	SmelA075	Rhizobiaceae	RNA47	1258309	1258427	-	NC_009636	Sinorhizobium medicae WSM419	366394	chromosome	1257614	1257814	-	Smed_1180	CDS	hypothetical protein													1258759	1258843	+	Smed_R0020	tRNA	tRNA-Leu	ORF18			ORF19
	SmelA075	Rhizobiaceae	RNA48	2043917	2044038	+	NC_011989	Agrobacterium vitis S4	311402	chromosome 1	2042548	2043660	-	Avi_2480	CDS	membrane protein													2044292	2044441	+	Avi_2481	CDS	hypothetical protein	ORF26			ORF18
	SmelA075	Phyllobacteriaceae	RNA49	890943	891063	+	NC_002678	Mesorhizobium loti MAFF303099	266835	chromosome	890180	890389	+	msr1062	CDS	hypothetical protein													891150	892568	+	mlr1064	CDS	tRNA (uracil-5-)-methyltransferase Gid	ORF18			ORF23
	SmelA075	Phyllobacteriaceae	RNA50	3674841	3674961	-	NC_014923	Mesorhizobium ciceri biovar biserrulae WSM1271	765698	chromosome	3673344	3674753	-	Mesci_3513	CDS	gid protein													3675321	3675461	-	Mesci_3514	CDS	hypothetical protein	ORF23			ORF18
	SmelA075	Phyllobacteriaceae	RNA51	890762	890882	+	NC_002678	Mesorhizobium loti MAFF303099	266835	chromosome	890180	890389	+	msr1062	CDS	hypothetical protein													891150	892568	+	mlr1064	CDS	tRNA (uracil-5-)-methyltransferase Gid	ORF18			ORF23
	SmelA075	Phyllobacteriaceae	RNA52	890584	890704	+	NC_002678	Mesorhizobium loti MAFF303099	266835	chromosome	890180	890389	+	msr1062	CDS	hypothetical protein													891150	892568	+	mlr1064	CDS	tRNA (uracil-5-)-methyltransferase Gid	ORF18			ORF23
	SmelA075	Phyllobacteriaceae	RNA53	3675020	3675140	-	NC_014923	Mesorhizobium ciceri biovar biserrulae WSM1271	765698	chromosome	3673344	3674753	-	Mesci_3513	CDS	gid protein													3675321	3675461	-	Mesci_3514	CDS	hypothetical protein	ORF23			ORF18
	SmelA075	Rhizobiaceae	RNA54	407206	407318	+	NC_008378	Rhizobium leguminosarum bv. viciae 3841	216596	plasmid pRL12	407072	407087	-		repeat_region		405332	407214	+		repeat_region		405592	407241	-		repeat_region		408099	409010	-	pRL120378	CDS	putative protein-L-isoaspartate O-methyltransferase	ORF34	ORF4	ORF34	ORF35
	SmelA075	Rhizobiaceae	RNA55	112608	112722	+	NC_012848	Rhizobium leguminosarum bv. trifolii WSM1325	395491	plasmid pR132501	111695	112336	+	Rleg_4742	CDS	hypothetical protein	112352	112612	+	Rleg_4743	CDS	hypothetical protein							113441	114331	-	Rleg_4745	CDS	protein-L-isoaspartate(D-aspartate) O-methyltransferase	ORF4	ORF4		ORF35
	SmelA075	Brucellaceae	RNA56	1275656	1275774	+	NC_009668	Ochrobactrum anthropi ATCC 49188	439375	chromosome 2	1275426	1275572	+	Oant_3865	CDS	hypothetical protein													1275787	1277010	-	Oant_3866	CDS	major facilitator transporter	ORF18			ORF36
	SmelA075	Brucellaceae	RNA57	339699	339808	+	NC_013119	Brucella microti CCM 4915	568815	chromosome 1	338771	339478	+	BMI_I332	CDS	LrgB family protein	339601	339987	+	BMI_I333	CDS	hypothetical protein							340025	341266	+	BMI_I334	CDS	lipoprotein, putative	ORF37	ORF38		ORF14
	SmelA075	Brucellaceae	RNA58	355557	355666	+	NC_010169	Brucella suis ATCC 23445	470137	chromosome I	354629	355336	+	BSUIS_A0355	CDS	LrgB family protein	355510	355845	+	BSUIS_A0356	CDS	hypothetical protein							357194	357562	+	BSUIS_A0358	CDS	transposase for insertion sequence element IS6501	ORF37	ORF38		ORF39
	SmelA075	Brucellaceae	RNA59	338021	338130	+	NC_010103	Brucella canis ATCC 23365	483179	chromosome I	337093	337800	+	BCAN_A0335	CDS	LrgB family protein	337974	338309	+	BCAN_A0336	CDS	hypothetical protein							338347	339588	+	BCAN_A0337	CDS	protein of unknown function DUF900 hydrolase family protein	ORF37	ORF38		ORF14
	SmelA075	Brucellaceae	RNA60	274689	274809	+	NC_009668	Ochrobactrum anthropi ATCC 49188	439375	chromosome 2	272174	273850	-	Oant_2969	CDS	hypothetical protein													275652	276380	+	Oant_2970	CDS	septum formation inhibitor	ORF40			ORF41
	SmelA075	Brucellaceae	RNA61	359682	359791	+	NC_009505	Brucella ovis ATCC 25840	444178	chromosome I	358754	359461	+	BOV_0342	CDS	hypothetical protein													361342	361653	+	BOV_0344	CDS	transposase OrfA	ORF37			ORF39
	SmelA075	Brucellaceae	RNA62	359925	360034	+	NC_006932	Brucella abortus bv. 1 str. 9-941	262698	chromosome I	358997	359704	+	BruAb1_0352	CDS	hypothetical protein													360250	361491	+	BruAb1_0354	CDS	lipoprotein	ORF37			ORF14
	SmelA075	Brucellaceae	RNA63	358310	358419	+	NC_010742	Brucella abortus S19	430066	chromosome 1	357382	358089	+	BAbS19_I03260	CDS	LrgB-like protein													358635	359876	+	BAbS19_I03270	CDS	Esterase/lipase/thioesterase, active site	ORF37			ORF14
	SmelA075	Brucellaceae	RNA64	356293	356402	+	NC_007618	Brucella melitensis biovar Abortus 2308	359391	chromosome I	355365	356072	+	BAB1_0356	CDS	LrgB-like protein													356618	357859	+	BAB1_0358	CDS	esterase/lipase/thioesterase, active site	ORF37			ORF14
	SmelA075	Brucellaceae	RNA65	358971	359079	+	CP002459	Brucella melitensis M28	941967	chromosome 1	358043	358750	+	BM28_A0358	CDS	LrgB family protein													359291	360538	+	BM28_A0359	CDS	esterase/lipase/thioesterase	ORF37			ORF14
	SmelA075	Brucellaceae	RNA66	358976	359084	+	NC_012441	Brucella melitensis ATCC 23457	546272	chromosome I	358048	358755	+	BMEA_A0364	CDS	LrgB family protein	358929	359264	+	BMEA_A0365	CDS	hypothetical protein							359302	360543	+	BMEA_A0366	CDS	hypothetical protein	ORF37	ORF38		ORF14
	SmelA075	Brucellaceae	RNA67	1644165	1644273	-	NC_003317	Brucella melitensis bv. 1 str. 16M	224914	chromosome I	1642706	1643914	-	BMEI1594	CDS	hypothetical protein	1643985	1644371	-	BMEI1595	CDS	hypothetical protein							1644494	1645201	-	BMEI1596	CDS	LrgB protein	ORF14	ORF38		ORF37
	SmelA075	Phyllobacteriaceae	RNA68	4952220	4952341	-	NC_002678	Mesorhizobium loti MAFF303099	266835	chromosome	4951975	4952181	+	mlr6118	CDS	cold-shock protein													4952439	4952903	-	mll6119	CDS	transcriptional regulatory protein	ORF42			ORF43
	SmelA075	Phyllobacteriaceae	RNA69	241411	241530	-	NC_014918	Mesorhizobium ciceri biovar biserrulae WSM1271	765698	plasmid pMESCI01	241107	241262	-	Mesci_6302	CDS	hypothetical protein													241784	242047	-	Mesci_6303	CDS	hypothetical protein	ORF44			ORF45
	SmelA075	Brucellaceae	RNA70	338032	338141	+	NC_004310	Brucella suis 1330	204722	chromosome I	337104	337811	+	BR0326	CDS	hypothetical protein	337934	338320	+	BR0327	CDS	hypothetical protein							338358	339599	+	BR0328	CDS	putative lipoprotein	ORF37	ORF38		ORF14
	SmelA075	Phyllobacteriaceae	RNA71	5265892	5266012	+	NC_014923	Mesorhizobium ciceri biovar biserrulae WSM1271	765698	chromosome	5264750	5265772	+	Mesci_5119	CDS	regulatory protein LacI	5265709	5265903	-	Mesci_5120	CDS	hypothetical protein							5266103	5266693	-	Mesci_5121	CDS	regulatory protein TetR	ORF46	ORF47		ORF48
	SmelA075	Phyllobacteriaceae	RNA72	6092420	6092539	-	NC_002678	Mesorhizobium loti MAFF303099	266835	chromosome	6091731	6092324	+	mlr7359	CDS	transcriptional regulator													6092659	6093681	-	mll7360	CDS	hypothetical protein	ORF48			ORF46
	SmelA075	Rhizobiaceae	RNA73	306337	306454	-	NC_011368	Rhizobium leguminosarum bv. trifolii WSM2304	395492	plasmid pRLG201	305380	306273	+	Rleg2_4668	CDS	protein-L-isoaspartate(D-aspartate) O-methyltransferase	306298	306825	+	Rleg2_4669	CDS	hypothetical protein							306976	307923	-	Rleg2_4670	CDS	transposase IS110 family protein	ORF35	ORF34		ORF49
	SmelA075	Rhizobiaceae	RNA74	2205315	2205430	+	NC_012586	Sinorhizobium fredii NGR234	394	plasmid pNGR234b	2204845	2205168	-	NGR_b21490	CDS	acylphosphatase													2205588	2206316	+	NGR_b21500	CDS	RNA polymerase sigma factor	ORF27			ORF28
	SmelA075	Brucellaceae	RNA75	448505	448616	+	NC_009667	Ochrobactrum anthropi ATCC 49188	439375	chromosome 1	447656	448351	+	Oant_0422	CDS	LrgB family protein													448748	450301	+	Oant_0423	CDS	glyoxalase/bleomycin resistance protein/dioxygenase	ORF37			ORF50
	SmelA075	Brucellaceae	RNA76	273975	274095	-	NC_009668	Ochrobactrum anthropi ATCC 49188	439375	chromosome 2	272174	273850	-	Oant_2969	CDS	hypothetical protein													275652	276380	+	Oant_2970	CDS	septum formation inhibitor	ORF40			ORF41
	SmelA075	Brucellaceae	RNA77	448110	448229	-	NC_004311	Brucella suis 1330	204722	chromosome II	446995	448053	+	BRA0460	CDS	hypothetical protein	448181	448369	+	BRA0461	CDS	hypothetical protein							448672	449391	+	BRA0462	CDS	TetR family transcriptional regulator	ORF51	ORF52		ORF53
	SmelA075	Brucellaceae	RNA78	766085	766204	+	NC_010740	Brucella abortus S19	430066	chromosome 2	764923	765642	-	BAbS19_II07190	CDS	regulatory protein TetR													766261	767346	-	BAbS19_II07200	CDS	hypothetical protein	ORF53			ORF51
	SmelA075	Brucellaceae	RNA79	449212	449331	-	NC_010167	Brucella suis ATCC 23445	470137	chromosome II	447158	447865	-	BSUIS_B0460	CDS	hypothetical protein	449283	449471	+	BSUIS_B0462	CDS	hypothetical protein							449774	450493	+	BSUIS_B0463	CDS	hypothetical protein	ORF54	ORF52		ORF53
	SmelA075	Phyllobacteriaceae	RNA80	2545676	2545787	+	NC_014923	Mesorhizobium ciceri biovar biserrulae WSM1271	765698	chromosome	2545134	2545592	+	Mesci_2426	CDS	phasin													2545962	2546038	+	Mesci_R0032	tRNA	tRNA-His	ORF55			ORF56
	SmelA075	Phyllobacteriaceae	RNA81	5350770	5350881	+	NC_002678	Mesorhizobium loti MAFF303099	266835	chromosome	5350228	5350686	+	mlr6541	CDS	hypothetical protein													5351042	5351115	+	MAFFt41	tRNA	tRNA-His	ORF55			ORF56
	SmelA075	Phyllobacteriaceae	RNA82	32192	32315	-	NC_008242	Mesorhizobium sp. BNC1	266779	plasmid 1	31210	31944	+	Meso_4134	CDS	hypothetical protein	32011	32697	+	Meso_4135	CDS	hypothetical protein							33959	34477	+	Meso_4137	CDS	hypothetical protein	ORF59	ORF47		ORF60
12	SmelA099	Rhizobiaceae	SmelA099	1328175	1328334	-	NC_003037	Sinorhizobium meliloti 1021	266834	plasmid pSymA	1327042	1328151	+	SMa2355	CDS	DNA polymerase IV													1329978	1330670	+	SMa2357	CDS	adenylate/guanylate cyclase	ORF1			ORF2
	SmelA099	Rhizobiaceae	RNA1	252032	252192	+	NC_015591	Sinorhizobium meliloti AK83	693982	chromosome 3	251307	251429	-	Sinme_5530	CDS	hypothetical protein													252215	253351	-	Sinme_5531	CDS	DNA-directed DNA polymerase	ORF3			ORF1
	SmelA099	Rhizobiaceae	RNA2	293091	293251	-	CP002741	Sinorhizobium meliloti BL225C	698936	plasmid pSINMEB01	291959	293068	+	SinmeB_5362	CDS	DNA-directed DNA polymerase													293847	293969	+	SinmeB_5363	CDS	hypothetical protein	ORF1			ORF3
	SmelA099	Rhizobiaceae	RNA3	316269	316430	+	NC_009621	Sinorhizobium medicae WSM419	366394	plasmid pSMED02	313859	314596	-	Smed_5352	CDS	putative adenylate/guanylate cyclase													316485	317621	-	Smed_5353	CDS	DNA polymerase IV	ORF2			ORF1
	SmelA099	Rhizobiaceae	RNA4	338833	338992	+	NC_009621	Sinorhizobium medicae WSM419	366394	plasmid pSMED02	338535	338681	+	Smed_5370	CDS	hypothetical protein													339017	339226	-	Smed_5371	CDS	hypothetical protein	ORF4			ORF5
	SmelA099	Rhizobiaceae	RNA5	1921116	1921277	-	NC_011983	Agrobacterium radiobacter K84	311403	chromosome 2	1920052	1920927	-	Arad_9216	CDS	putative glutathione S-transferase YghU													1921485	1921631	-	Arad_9217	CDS	hypothetical protein	ORF6			ORF4
	SmelA099	Rhizobiaceae	RNA6	957652	957812	+	NC_011983	Agrobacterium radiobacter K84	311403	chromosome 2	957315	957461	+	Arad_8084	CDS	hypothetical protein													957909	958754	-	Arad_8086	CDS	hypothetical protein	ORF4			ORF7
	SmelA099	Rhizobiaceae	RNA7	345898	346055	-	NC_010998	Rhizobium etli CIAT 652	491916	plasmid pA	344808	345644	-	RHECIAT_PA0000319	CDS	5-keto-4-deoxyuronate isomerase													346130	346366	-	RHECIAT_PA0000320	CDS	hypothetical protein	ORF8			ORF4
	SmelA099	Rhizobiaceae	RNA8	138500	138660	-	NC_011987	Agrobacterium radiobacter K84	311403	plasmid pAtK84c	137950	138255	+	Arad_12190	CDS	FAD dependent oxidoreductase													139226	140683	-	Arad_12193	CDS	Cytochrome c, mono- and diheme variant	ORF9			ORF10
	SmelA099	Rhizobiaceae	RNA9	50780	50938	+	NC_011366	Rhizobium leguminosarum bv. trifolii WSM2304	395492	plasmid pRLG202	50447	50593	+	Rleg2_5661	CDS	protein of unknown function DUF1127													51199	52035	+	Rleg2_5662	CDS	5-keto-4-deoxyuronate isomerase	ORF4			ORF8
	SmelA099	Rhizobiaceae	RNA10	2793809	2793969	-	NC_011989	Agrobacterium vitis S4	311402	chromosome 1	2792636	2793793	+	Avi_3374	CDS	DNA polymerase IV													2794154	2794300	-	Avi_3375	CDS	hypothetical protein	ORF1			ORF4
	SmelA099	Rhizobiaceae	RNA11	900999	901160	+	NC_011988	Agrobacterium vitis S4	311402	chromosome 2	899428	900909	+	Avi_5890	CDS	sulfate permease													901178	902659	-	Avi_5891	CDS	siroheme synthase	ORF11			ORF12
	SmelA099	Rhizobiaceae	RNA12	598431	598590	-	NC_011988	Agrobacterium vitis S4	311402	chromosome 2	597555	598229	+	Avi_5586	CDS	hypothetical protein													598779	598925	-	Avi_5587	CDS	hypothetical protein	ORF13			ORF4
	SmelA099	Rhizobiaceae	RNA13	1173478	1173639	+	NC_010994	Rhizobium etli CIAT 652	491916	chromosome	1172125	1173279	-	RHECIAT_CH0001166	CDS	putative polyhydroxybutyrate depolymerase protein	1173597	1173884	-	RHECIAT_CH0001167	CDS	hypothetical protein							1173948	1174214	+	RHECIAT_CH0001168	CDS	hypothetical protein	ORF14	ORF15		ORF16
	SmelA099	Rhizobiaceae	RNA14	28612	28769	+	NC_012858	Rhizobium leguminosarum bv. trifolii WSM1325	395491	plasmid pR132502	28280	28426	+	Rleg_6602	CDS	protein of unknown function DUF1127													29055	29891	+	Rleg_6603	CDS	5-keto-4-deoxyuronate isomerase	ORF4			ORF8
	SmelA099	Rhizobiaceae	RNA15	443006	443162	-	NC_007765	Rhizobium etli CFN 42	347834	plasmid p42e	441962	442798	-	RHE_PE00400	CDS	5-keto-4-deoxyuronate isomerase													443336	443482	-	RHE_PE00401	CDS	hypothetical protein	ORF8			ORF4
	SmelA099	Rhizobiaceae	RNA16	574469	574626	-	NC_008384	Rhizobium leguminosarum bv. viciae 3841	216596	plasmid pRL11	573348	574184	-	pRL110530	CDS	5-keto-4-deoxyuronate isomerase	574203	574637	-	pRL110531	CDS	hypothetical protein							574811	574957	-	pRL110532	CDS	hypothetical protein	ORF8	ORF17		ORF4
	SmelA099	Rhizobiaceae	RNA17	607603	607761	+	NC_011368	Rhizobium leguminosarum bv. trifolii WSM2304	395492	plasmid pRLG201	607180	607512	+	Rleg2_4962	CDS	hypothetical protein													609168	609533	+	Rleg2_4966	CDS	hypothetical protein	ORF18			ORF19
	SmelA099	Rhizobiaceae	RNA18	2284	2442	-	NC_012854	Rhizobium leguminosarum bv. trifolii WSM1325	395491	plasmid pR132505	122	1300	+	Rleg_6287	CDS	hypothetical protein													2547	2873	-	Rleg_6289	CDS	hypothetical protein	ORF20			ORF18
	SmelA099	Rhizobiaceae	RNA19	244662	244819	-	NC_015508	Agrobacterium sp. H13-3	861208	chromosome linear	243567	244646	+	AGROH133_09818	CDS	DNA polymerase IV													244945	247116	-	AGROH133_09819	CDS	hydroxamate-type ferrisiderophore receptor	ORF1			ORF21
	SmelA099	Rhizobiaceae	RNA20	163997	164158	-	NC_015508	Agrobacterium sp. H13-3	861208	chromosome linear	163498	163941	+	AGROH133_09614	CDS	response regulator													164384	164530	-	AGROH133_09615	CDS	hypothetical protein	ORF22			ORF4
	SmelA099	Rhizobiaceae	RNA21	265911	266071	+	NC_012848	Rhizobium leguminosarum bv. trifolii WSM1325	395491	plasmid pR132501	264545	265168	-	Rleg_4882	CDS	plasmid pRiA4b ORF-3 family protein													268316	268603	-	Rleg_4886	CDS	hypothetical protein	ORF23			ORF24
	SmelA099	Rhizobiaceae	RNA22	77635	77794	+	NC_004041	Rhizobium etli CFN 42	347834	plasmid symbiotic plasmid p42d	76971	77354	+	RHE_PD00068	CDS	hypothetical protein													77912	78484	+	RHE_PD00069	CDS	hypothetical protein	ORF25			ORF26
	SmelA099	Rhizobiaceae	RNA23	112259	112418	+	NC_010996	Rhizobium etli CIAT 652	491916	plasmid pB	111975	112217	-	RHECIAT_PB0000101	CDS	hypothetical protein													112536	113108	+	RHECIAT_PB0000102	CDS	hypothetical protein	ORF27			ORF26
	SmelA099	Rhizobiaceae	RNA24	119280	119437	+	NC_012852	Rhizobium leguminosarum bv. trifolii WSM1325	395491	plasmid pR132504	118943	119089	+	Rleg_6084	CDS	protein of unknown function DUF1127													119664	120056	-	Rleg_6085	CDS	hypothetical protein	ORF4			ORF28
	SmelA099	Rhizobiaceae	RNA25	1831445	1831608	+	NC_003063	Agrobacterium tumefaciens str. C58	176299	chromosome linear	1831052	1831294	-	Atu4670	CDS	hypothetical protein													1831642	1832085	-	Atu4671	CDS	response regulator	ORF29			ORF22
	SmelA099	Brucellaceae	RNA26	2453939	2454093	+	NC_009667	Ochrobactrum anthropi ATCC 49188	439375	chromosome 1	2453758	2453904	+	Oant_2332	CDS	hypothetical protein													2454171	2455601	+	Oant_2333	CDS	tRNA (uracil-5-)-methyltransferase Gid	ORF4			ORF30
	SmelA099	Brucellaceae	RNA27	888709	888867	-	NC_010169	Brucella suis ATCC 23445	470137	chromosome I	887235	888635	-	BSUIS_A0933	CDS	tRNA (uracil-5-)-methyltransferase Gid													888895	889041	-	BSUIS_A0934	CDS	hypothetical protein	ORF30			ORF4
	SmelA099	Brucellaceae	RNA28	867213	867371	-	NC_010103	Brucella canis ATCC 23365	483179	chromosome I	865739	867139	-	BCAN_A0908	CDS	tRNA (uracil-5-)-methyltransferase Gid													867399	867545	-	BCAN_A0909	CDS	hypothetical protein	ORF30			ORF4
	SmelA099	Brucellaceae	RNA29	873045	873203	-	NC_013119	Brucella microti CCM 4915	568815	chromosome 1	871571	872971	-	BMI_I892	CDS	tRNA (uracil-5-)-methyltransferase Gid													873231	873377	-	BMI_I893	CDS	hypothetical protein	ORF30			ORF4
	SmelA099	Brucellaceae	RNA30	868843	869001	-	NC_004310	Brucella suis 1330	204722	chromosome I	867369	868769	-	BR0894	CDS	tRNA (uracil-5-)-methyltransferase Gid													869029	869175	-	BR0895	CDS	hypothetical protein	ORF30			ORF4
	SmelA099	Brucellaceae	RNA31	890284	890442	-	CP002459	Brucella melitensis M28	941967	chromosome 1	888810	890246	-	BM28_A0904	CDS	tRNA (uracil-5-)-methyltransferase Gid													890452	890598	-	BM28_A0905	CDS	conserved hypothetical protein	ORF30			ORF4
	SmelA099	Brucellaceae	RNA32	890572	890730	-	NC_006932	Brucella abortus bv. 1 str. 9-941	262698	chromosome I	889098	890498	-	BruAb1_0906	CDS	tRNA (uracil-5-)-methyltransferase Gid													890740	890886	-	BruAb1_0907	CDS	hypothetical protein	ORF30			ORF4
	SmelA099	Brucellaceae	RNA33	886850	887008	-	NC_007618	Brucella melitensis biovar Abortus 2308	359391	chromosome I	885376	886776	-	BAB1_0913	CDS	tRNA (uracil-5-)-methyltransferase Gid													887018	887164	-	BAB1_0914	CDS	hypothetical protein	ORF30			ORF4
	SmelA099	Brucellaceae	RNA34	1116625	1116783	+	NC_003317	Brucella melitensis bv. 1 str. 16M	224914	chromosome I	1116469	1116615	+	BMEI1072	CDS	hypothetical protein													1116821	1118257	+	BMEI1073	CDS	tRNA (uracil-5-)-methyltransferase Gid	ORF4			ORF30
	SmelA099	Brucellaceae	RNA35	888873	889031	-	NC_010742	Brucella abortus S19	430066	chromosome 1	887399	888799	-	BAbS19_I08530	CDS	tRNA (uracil-5-)-methyltransferase Gid													889041	889187	-	BAbS19_I08540	CDS	hypothetical protein	ORF30			ORF4
	SmelA099	Brucellaceae	RNA36	890339	890497	-	NC_012441	Brucella melitensis ATCC 23457	546272	chromosome I	888865	890265	-	BMEA_A0933	CDS	tRNA (uracil-5-)-methyltransferase Gid													890507	890653	-	BMEA_A0934	CDS	hypothetical protein	ORF30			ORF4
	SmelA099	Brucellaceae	RNA37	895745	895903	-	NC_009505	Brucella ovis ATCC 25840	444178	chromosome I	894271	895671	-	BOV_0890	CDS	tRNA (uracil-5-)-methyltransferase Gid													895931	896077	-	BOV_0891	CDS	hypothetical protein	ORF30			ORF4
13	SmelB003	Rhizobiaceae	SmelB003	30239	30346	+	NC_003078	Sinorhizobium meliloti 1021	266834	plasmid pSymB	30111	30160	-		repeat_region														30658	31224	+	SM_b20022	CDS	hypothetical protein	ORF1			ORF2
	SmelB003	Rhizobiaceae	RNA1	1270919	1271027	-	CP002742	Sinorhizobium meliloti BL225C	698936	plasmid pSINMEB02	1270042	1270608	-	SinmeB_4644	CDS	dienelactone hydrolase													1271256	1271726	-	SinmeB_4645	CDS	transcriptional regulator, AsnC family	ORF2			ORF3
	SmelB003	Rhizobiaceae	RNA2	468934	469042	-	NC_015596	Sinorhizobium meliloti AK83	693982	chromosome 2	468057	468623	-	Sinme_4148	CDS	dienelactone hydrolase													469271	469741	-	Sinme_4149	CDS	AsnC family transcriptional regulator	ORF2			ORF3
	SmelB003	Rhizobiaceae	RNA3	573649	573754	-	NC_009620	Sinorhizobium medicae WSM419	366394	plasmid pSMED01	572611	573177	-	Smed_4107	CDS	dienelactone hydrolase	573413	573784	-	Smed_4108	CDS	hypothetical protein							573829	574296	-	Smed_4109	CDS	AsnC family transcriptional regulator	ORF2	ORF4		ORF3
14	SmelB008	Rhizobiaceae	SmelB008	65071	65147	+	NC_003078	Sinorhizobium meliloti 1021	266834	plasmid pSymB	63995	64984	+	SM_b20055	CDS	putative transcriptional regulator protein													65450	65499	-		repeat_region		ORF1			ORF2
	SmelB008	Rhizobiaceae	RNA1	1235873	1235950	-	CP002742	Sinorhizobium meliloti BL225C	698936	plasmid pSINMEB02	1235314	1235469	+	SinmeB_4612	CDS	hypothetical protein													1236037	1237026	-	SinmeB_4613	CDS	transcriptional regulator, AraC family	ORF3			ORF1
	SmelB008	Rhizobiaceae	RNA2	433880	433957	-	NC_015596	Sinorhizobium meliloti AK83	693982	chromosome 2	433322	433477	+	Sinme_4117	CDS	hypothetical protein													434044	435033	-	Sinme_4118	CDS	AraC family transcriptional regulator	ORF3			ORF1
	SmelB008	Rhizobiaceae	RNA3	544286	544363	-	NC_009620	Sinorhizobium medicae WSM419	366394	plasmid pSMED01	543503	543886	-	Smed_4082	CDS	hypothetical protein													544377	545402	-	Smed_4083	CDS	AraC family transcriptional regulator	ORF4			ORF1
15	SmelB009	Rhizobiaceae	SmelB009	65187	65266	-	NC_003078	Sinorhizobium meliloti 1021	266834	plasmid pSymB	63995	64984	+	SM_b20055	CDS	putative transcriptional regulator protein													65450	65499	-		repeat_region		ORF1			ORF2
	SmelB009	Rhizobiaceae	RNA1	433762	433842	+	NC_015596	Sinorhizobium meliloti AK83	693982	chromosome 2	433322	433477	+	Sinme_4117	CDS	hypothetical protein													434044	435033	-	Sinme_4118	CDS	AraC family transcriptional regulator	ORF3			ORF1
	SmelB009	Rhizobiaceae	RNA2	1235754	1235835	+	CP002742	Sinorhizobium meliloti BL225C	698936	plasmid pSINMEB02	1235314	1235469	+	SinmeB_4612	CDS	hypothetical protein													1236037	1237026	-	SinmeB_4613	CDS	transcriptional regulator, AraC family	ORF3			ORF1
	SmelB009	Rhizobiaceae	RNA3	544155	544236	+	NC_009620	Sinorhizobium medicae WSM419	366394	plasmid pSMED01	543503	543886	-	Smed_4082	CDS	hypothetical protein													544377	545402	-	Smed_4083	CDS	AraC family transcriptional regulator	ORF4			ORF1
16	SmelB033	Rhizobiaceae	SmelB033	379318	379391	-	NC_003078	Sinorhizobium meliloti 1021	266834	plasmid pSymB	378030	379034	+	SM_b20366	CDS	putative transcriptional regulator protein													379530	380222	-	SM_b20367	CDS	putative transcriptional regulator protein	ORF1			ORF2
	SmelB033	Rhizobiaceae	RNA1	918786	918860	+	CP002742	Sinorhizobium meliloti BL225C	698936	plasmid pSINMEB02	917955	918647	+	SinmeB_4307	CDS	transcriptional regulator, TetR family													919143	920147	-	SinmeB_4308	CDS	transcriptional regulator, LacI family	ORF2			ORF1
	SmelB033	Rhizobiaceae	RNA2	120761	120835	+	NC_015596	Sinorhizobium meliloti AK83	693982	chromosome 2	119930	120622	+	Sinme_3811	CDS	TetR family transcriptional regulator													121116	122123	-	Sinme_3812	CDS	LacI family transcriptional regulator	ORF2			ORF1
	SmelB033	Rhizobiaceae	RNA3	194109	194181	+	NC_009620	Sinorhizobium medicae WSM419	366394	plasmid pSMED01	193310	194002	+	Smed_3750	CDS	TetR family transcriptional regulator													194520	195527	-	Smed_3751	CDS	periplasmic binding protein/LacI transcriptional regulator	ORF2			ORF1
	SmelB033	Rhizobiaceae	RNA4	1463201	1463280	-	CP002741	Sinorhizobium meliloti BL225C	698936	plasmid pSINMEB01	1462490	1462696	+	SinmeB_6565	CDS	CsbD family protein													1463741	1464001	-	SinmeB_6566	CDS	hypothetical protein	ORF3			ORF4
	SmelB033	Rhizobiaceae	RNA5	10405	10484	-	NC_015591	Sinorhizobium meliloti AK83	693982	chromosome 3	10081	10176	+	Sinme_5286	CDS	hypothetical protein													10946	11221	-	Sinme_5287	CDS	hypothetical protein	ORF5			ORF4
	SmelB033	Rhizobiaceae	RNA6	241734	241813	+	NC_003037	Sinorhizobium meliloti 1021	266834	plasmid pSymA	240985	241272	+	SMa0450	CDS	hypothetical protein													243155	243562	+	SMa0453	CDS	hypothetical protein	ORF4			ORF6
	SmelB033	Rhizobiaceae	RNA7	1855593	1855667	+	NC_003047	Sinorhizobium meliloti 1021	266834	chromosome	1854027	1855223	+	SMc00285	CDS	transposase ISRM3													1855870	1856193	+	SMc04866	CDS	hypothetical protein	ORF7			ORF8
	SmelB033	Rhizobiaceae	RNA8	1621387	1621461	+	NC_015590	Sinorhizobium meliloti AK83	693982	chromosome 1	1619518	1620420	+	Sinme_1616	CDS	LysR family transcriptional regulator													1621727	1621987	+	Sinme_1617	CDS	hypothetical protein	ORF9			ORF8
	SmelB033	Rhizobiaceae	RNA9	1520842	1520917	+	CP002740	Sinorhizobium meliloti BL225C	698936	chromosome	1518974	1519876	+	SinmeB_1461	CDS	transcriptional regulator, LysR family													1521183	1521443	+	SinmeB_1462	CDS	hypothetical protein	ORF9			ORF8
	SmelB033	Rhizobiaceae	RNA10	662491	662569	+	CP002742	Sinorhizobium meliloti BL225C	698936	plasmid pSINMEB02	662185	662355	+	SinmeB_4057	CDS	hypothetical protein	662517	662621	-	SinmeB_4058	CDS	hypothetical protein							662703	662864	+	SinmeB_4059	CDS	hypothetical protein	ORF10	ORF11		ORF12
	SmelB033	Rhizobiaceae	RNA11	1472212	1472286	+	NC_015596	Sinorhizobium meliloti AK83	693982	chromosome 2	1471201	1471650	+	Sinme_5069	CDS	hypothetical protein													1472447	1472608	+	Sinme_5070	CDS	hypothetical protein	ORF13			ORF12
	SmelB033	Rhizobiaceae	RNA12	214245	214339	+	NC_015597	Sinorhizobium meliloti AK83	693982	plasmid pSINME01	213491	213751	+	Sinme_6837	CDS	hypothetical protein													214483	214734	-	Sinme_6838	CDS	hypothetical protein	ORF8			ORF14
	SmelB033	Rhizobiaceae	RNA13	1739805	1739880	+	CP002740	Sinorhizobium meliloti BL225C	698936	chromosome	1739229	1739558	+	SinmeB_1670	CDS	hypothetical protein													1739981	1740241	+	SinmeB_1671	CDS	hypothetical protein	ORF15			ORF8
17	SmelB044	Rhizobiaceae	SmelB044	541771	541907	-	NC_003078	Sinorhizobium meliloti 1021	266834	plasmid pSymB	541280	541606	+	SM_b20516	CDS	putative response regulator protein													542357	542647	-	SM_b20517	CDS	hypothetical protein	ORF1			ORF2
	SmelB044	Rhizobiaceae	RNA1	765631	765769	+	CP002742	Sinorhizobium meliloti BL225C	698936	plasmid pSINMEB02	763728	764837	-	SinmeB_4167	CDS	NADPH-dependent FMN reductase													765934	766344	-	SinmeB_4168	CDS	response regulator receiver	ORF3			ORF1
	SmelB044	Rhizobiaceae	RNA2	1648838	1648974	+	NC_015596	Sinorhizobium meliloti AK83	693982	chromosome 2	1647377	1648711	-	Sinme_5251	CDS	transposase IS4 family protein													1649139	1649549	-	Sinme_5252	CDS	response regulator receiver	ORF4			ORF1
	SmelB044	Rhizobiaceae	RNA3	703934	704071	-	NC_009621	Sinorhizobium medicae WSM419	366394	plasmid pSMED02	702157	702675	+	Smed_5733	CDS	GCN5-related N-acetyltransferase													705316	705777	-	Smed_5738	CDS	hypothetical protein	ORF5			ORF6
	SmelB044	Rhizobiaceae	RNA4	609620	609761	-	NC_009621	Sinorhizobium medicae WSM419	366394	plasmid pSMED02	607955	609262	+	Smed_5642	CDS	hypothetical protein	609524	609658	-	Smed_5643	CDS	hypothetical protein							610988	611296	+	Smed_5646	CDS	hypothetical protein	ORF7	ORF8		ORF9
	SmelB044	Rhizobiaceae	RNA5|SmelB032	379137	379268	+	NC_003078	Sinorhizobium meliloti 1021	266834	plasmid pSymB	378030	379034	+	SM_b20366	CDS	putative transcriptional regulator protein													379530	380222	-	SM_b20367	CDS	putative transcriptional regulator protein	ORF10			ORF11
	SmelB044	Rhizobiaceae	RNA6	918908	919040	-	CP002742	Sinorhizobium meliloti BL225C	698936	plasmid pSINMEB02	917955	918647	+	SinmeB_4307	CDS	transcriptional regulator, TetR family													919143	920147	-	SinmeB_4308	CDS	transcriptional regulator, LacI family	ORF11			ORF10
	SmelB044	Rhizobiaceae	RNA7	120882	121014	-	NC_015596	Sinorhizobium meliloti AK83	693982	chromosome 2	119930	120622	+	Sinme_3811	CDS	TetR family transcriptional regulator													121116	122123	-	Sinme_3812	CDS	LacI family transcriptional regulator	ORF11			ORF10
	SmelB044	Rhizobiaceae	RNA8	194251	194383	-	NC_009620	Sinorhizobium medicae WSM419	366394	plasmid pSMED01	193310	194002	+	Smed_3750	CDS	TetR family transcriptional regulator													194520	195527	-	Smed_3751	CDS	periplasmic binding protein/LacI transcriptional regulator	ORF11			ORF10
18	SmelB053	Rhizobiaceae	SmelB053	577730	577871	+	NC_003078	Sinorhizobium meliloti 1021	266834	plasmid pSymB	576952	577398	-	SM_b20551	CDS	hypothetical protein													578150	578881	+	SM_b20552	CDS	hypothetical protein	ORF1			ORF2
	SmelB053	Rhizobiaceae	RNA1	737764	737905	-	CP002742	Sinorhizobium meliloti BL225C	698936	plasmid pSINMEB02	736754	737485	-	SinmeB_4135	CDS	phospholipase/Carboxylesterase													738381	738683	+	SinmeB_4136	CDS	protein of unknown function DUF982	ORF2			ORF1
	SmelB053	Rhizobiaceae	RNA2	741075	741208	-	CP002742	Sinorhizobium meliloti BL225C	698936	plasmid pSINMEB02	740667	740783	+	SinmeB_4141	CDS	hypothetical protein													741423	741902	-	SinmeB_4142	CDS	hypothetical protein	ORF3			ORF4
	SmelB053	Rhizobiaceae	RNA3	1621039	1621180	-	NC_015596	Sinorhizobium meliloti AK83	693982	chromosome 2	1620034	1620765	-	Sinme_5220	CDS	phospholipase/carboxylesterase													1621420	1621521	-	Sinme_5221	CDS	hypothetical protein	ORF2			ORF5
	SmelB053	Rhizobiaceae	RNA4	1625306	1625440	-	NC_015596	Sinorhizobium meliloti AK83	693982	chromosome 2	1624896	1625114	+	Sinme_5227	CDS	hypothetical protein													1625610	1626227	-	Sinme_5228	CDS	hypothetical protein	ORF3			ORF4
	SmelB053	Rhizobiaceae	RNA5|SmelB050	574628	574765	+	NC_003078	Sinorhizobium meliloti 1021	266834	plasmid pSymB	573930	574424	+	SM_b20548	CDS	hypothetical protein													576048	576365	+	SM_b20549	CDS	hypothetical protein	ORF4			ORF6
	SmelB053	Rhizobiaceae	RNA6	136368	136511	+	NC_007766	Rhizobium etli CFN 42	347834	plasmid p42f	133963	134406	-	RHE_PF00127	CDS	hypothetical protein	136269	136700	+	RHE_PF00128	CDS	hypothetical protein							137962	138264	+	RHE_PF00129	CDS	hypothetical protein	ORF7	ORF8		ORF9
	SmelB053	Rhizobiaceae	RNA7	132595	132736	+	NC_003063	Agrobacterium tumefaciens str. C58	176299	chromosome linear	132103	132318	+	Atu3124	CDS	hypothetical protein													133057	133344	+	Atu3126	CDS	hypothetical protein	ORF10			ORF11
	SmelB053	Rhizobiaceae	RNA8	114244	114385	-	NC_012852	Rhizobium leguminosarum bv. trifolii WSM1325	395491	plasmid pR132504	113829	114197	+	Rleg_6079	CDS	hypothetical protein													114489	115121	-	Rleg_6080	CDS	hypothetical protein	ORF12			ORF13
	SmelB053	Rhizobiaceae	RNA9	124029	124164	+	NC_008384	Rhizobium leguminosarum bv. viciae 3841	216596	plasmid pRL11	122566	123456	+	pRL110105	CDS	LysR family transcriptional regulator													124229	124447	-	pRL110106	CDS	hypothetical protein	ORF14			ORF15
	SmelB053	Rhizobiaceae	RNA10	577473	577614	+	NC_015508	Agrobacterium sp. H13-3	861208	chromosome linear	577186	577326	+	AGROH133_10553	CDS	hypothetical protein													577790	577885	-	AGROH133_10554	CDS	hypothetical protein	ORF16			ORF17
	SmelB053	Rhizobiaceae	RNA11	2256716	2256856	+	NC_008380	Rhizobium leguminosarum bv. viciae 3841	216596	chromosome	2256297	2256500	+	RL2133	CDS	hypothetical protein	2256617	2256982	-	RL2134	CDS	hypothetical protein							2256994	2257383	+	RL2135	CDS	transposase-related protein	ORF18	ORF19		ORF20
	SmelB053	Rhizobiaceae	RNA12	466251	466404	-	NC_012858	Rhizobium leguminosarum bv. trifolii WSM1325	395491	plasmid pR132502	465959	466222	+	Rleg_7049	CDS	hypothetical protein													466934	467824	-	Rleg_7050	CDS	transcriptional regulator, LysR family	ORF15			ORF14
	SmelB053	Rhizobiaceae	RNA13	2835684	2835766	+	NC_009636	Sinorhizobium medicae WSM419	366394	chromosome	2835011	2835397	+	Smed_2721	CDS	Sel1 domain-containing protein	2835699	2835863	+	Smed_2722	CDS	hypothetical protein							2835974	2837812	+	Smed_2723	CDS	dihydroxy-acid dehydratase	ORF21	ORF8		ORF22
	SmelB053	Rhizobiaceae	RNA14	2756499	2756582	+	CP002740	Sinorhizobium meliloti BL225C	698936	chromosome	2756229	2756303	+	SinmeB_R0045	tRNA	tRNA-Val													2756736	2758574	+	SinmeB_2657	CDS	Dihydroxy-acid dehydratase	ORF23			ORF22
	SmelB053	Rhizobiaceae	RNA15	2904616	2904699	+	NC_015590	Sinorhizobium meliloti AK83	693982	chromosome 1	2904346	2904420	+	Sinme_R0047	tRNA	tRNA-Val													2904853	2906691	+	Sinme_2881	CDS	dihydroxy-acid dehydratase	ORF23			ORF22
	SmelB053	Rhizobiaceae	RNA16|SmelC691	3048822	3048904	+	NC_003047	Sinorhizobium meliloti 1021	266834	chromosome	3048552	3048626	+	SMc04060	tRNA	tRNA-Val													3049059	3050897	+	SMc04045	CDS	dihydroxy-acid dehydratase	ORF23			ORF22
	SmelB053	Brucellaceae	RNA17	1587135	1587279	-	NC_009668	Ochrobactrum anthropi ATCC 49188	439375	chromosome 2	1586007	1587065	+	Oant_4157	CDS	glutamate--ammonia ligase													1587338	1587724	-	Oant_4158	CDS	hypothetical protein	ORF24			ORF25
	SmelB053	Rhizobiaceae	RNA18	814033	814171	+	NC_015590	Sinorhizobium meliloti AK83	693982	chromosome 1	813246	813866	+	Sinme_0799	CDS	hypothetical protein													814218	814409	-	Sinme_0800	CDS	hypothetical protein	ORF4			ORF26
19	SmelB064	Rhizobiaceae	SmelB064	677941	678026	-	NC_003078	Sinorhizobium meliloti 1021	266834	plasmid pSymB	676928	677401	+	SM_b21046	CDS	putative transposase of insertion sequence ISRm10-1, orfB C-terminus protein													679969	680235	-	SM_b21047	CDS	hypothetical protein	ORF1			ORF2
	SmelB064	Rhizobiaceae	RNA1	637616	637702	+	CP002742	Sinorhizobium meliloti BL225C	698936	plasmid pSINMEB02	635841	636617	-	SinmeB_4024	CDS	two component transcriptional regulator, LuxR family													637829	638077	+	SinmeB_4025	CDS	acyl carrier protein	ORF3			ORF4
	SmelB064	Rhizobiaceae	RNA2	1442100	1442186	+	NC_015596	Sinorhizobium meliloti AK83	693982	chromosome 2	1441221	1441679	-	Sinme_5035	CDS	transposase IS3/IS911 family protein													1442312	1442560	+	Sinme_5036	CDS	acyl carrier protein	ORF5			ORF4
20	SmelB075	Rhizobiaceae	SmelB075	800730	800793	-	NC_003078	Sinorhizobium meliloti 1021	266834	plasmid pSymB	799997	800389	-	SM_b21234	CDS	transposase of insertion sequence ISRm1 orfA protein													800870	801808	-	SM_b21235	CDS	putative formyltransferase, methionyl-tRNA(fMet) N-formyltransferase protein	ORF1			ORF2
	SmelB075	Rhizobiaceae	RNA1	518865	518929	+	CP002742	Sinorhizobium meliloti BL225C	698936	plasmid pSINMEB02	517850	518788	+	SinmeB_3922	CDS	Methionyl-tRNA formyltransferase													519170	521269	+	SinmeB_3923	CDS	polysaccharide biosynthesis protein CapD	ORF2			ORF3
	SmelB075	Rhizobiaceae	RNA2	1366613	1366677	+	NC_015596	Sinorhizobium meliloti AK83	693982	chromosome 2	1365598	1366536	+	Sinme_4963	CDS	methionyl-tRNA formyltransferase													1366919	1369018	+	Sinme_4964	CDS	polysaccharide biosynthesis protein CapD	ORF2			ORF3
	SmelB075	Rhizobiaceae	RNA3	1058840	1058904	-	NC_009620	Sinorhizobium medicae WSM419	366394	plasmid pSMED01	1056505	1058700	-	Smed_4568	CDS	polysaccharide biosynthesis protein CapD													1059069	1059983	-	Smed_4569	CDS	formyl transferase domain-containing protein	ORF3			ORF2
21	SmelB095	Rhizobiaceae	SmelB095	1018406	1018481	+	NC_003078	Sinorhizobium meliloti 1021	266834	plasmid pSymB	1017835	1018332	-	SM_b21352	CDS	putative C4-dicarboxylate small membrane transport protein													1018487	1019464	-	SM_b21353	CDS	putative periplasmic C4-dicarboxylate transport protein	ORF1			ORF2
	SmelB095	Rhizobiaceae	RNA1	300154	300230	-	CP002742	Sinorhizobium meliloti BL225C	698936	plasmid pSINMEB02	299172	300149	+	SinmeB_3738	CDS	TRAP dicarboxylate transporter, DctP subunit													300241	300801	+	SinmeB_3739	CDS	Tripartite ATP-independent periplasmic transporter DctQ component	ORF2			ORF1
	SmelB095	Rhizobiaceae	RNA2	1147644	1147720	-	NC_015596	Sinorhizobium meliloti AK83	693982	chromosome 2	1146662	1147639	+	Sinme_4779	CDS	TRAP dicarboxylate transporter DctP subunit													1147731	1148291	+	Sinme_4780	CDS	Tripartite ATP-independent periplasmic transporter DctQ component	ORF2			ORF1
	SmelB095	Rhizobiaceae	RNA3	1269306	1269381	+	NC_009620	Sinorhizobium medicae WSM419	366394	plasmid pSMED01	1268734	1269294	-	Smed_4747	CDS	tripartite ATP-independent periplasmic transporter DctQ													1269479	1270456	-	Smed_4748	CDS	TRAP dicarboxylate transporter subunit DctP	ORF1			ORF2
22	SmelB126	Rhizobiaceae	SmelB126	1325476	1325586	+	NC_003078	Sinorhizobium meliloti 1021	266834	plasmid pSymB	1324615	1324875	-	SM_b20916	CDS	hypothetical protein													1325820	1327138	+		repeat_region		ORF1			ORF2
	SmelB126	Rhizobiaceae	RNA1|SmelB047	545360	545471	-	NC_003078	Sinorhizobium meliloti 1021	266834	plasmid pSymB	543981	544349	+	SM_b20519	CDS	hypothetical protein													546127	546684	+	SM_b20520	CDS	hypothetical protein	ORF3			ORF4
	SmelB126	Rhizobiaceae	RNA2	523192	523300	-	CP002741	Sinorhizobium meliloti BL225C	698936	plasmid pSINMEB01	522224	522565	+	SinmeB_5604	CDS	protein of unknown function DUF1515	522706	523245	-	SinmeB_5605	CDS	hypothetical protein							523705	523878	+	SinmeB_5607	CDS	Protein of unknown function DUF3606	ORF3	ORF5		ORF6
	SmelB126	Rhizobiaceae	RNA3	832998	833106	+	CP002741	Sinorhizobium meliloti BL225C	698936	plasmid pSINMEB01	832204	832476	+	SinmeB_5906	CDS	cold-shock DNA-binding domain protein													835268	835513	+	SinmeB_5911	CDS	hypothetical protein	ORF7			ORF8
	SmelB126	Rhizobiaceae	RNA4	14718	14831	-	NC_009622	Sinorhizobium medicae WSM419	366394	plasmid pSMED03	14195	14617	+	Smed_6346	CDS	hypothetical protein													15134	15307	+	Smed_6347	CDS	hypothetical protein	ORF9			ORF6
	SmelB126	Rhizobiaceae	RNA5	13938	14043	-	NC_009622	Sinorhizobium medicae WSM419	366394	plasmid pSMED03	13165	13722	-	Smed_6345	CDS	transposase mutator type													14195	14617	+	Smed_6346	CDS	hypothetical protein	ORF10			ORF9
	SmelB126	Rhizobiaceae	RNA6|SmelA072	1161767	1161875	+	NC_003037	Sinorhizobium meliloti 1021	266834	plasmid pSymA	1161474	1161689	-	SMa2057	CDS	hypothetical protein													1161899	1162480	-	SMa2059	CDS	hypothetical protein	ORF11			ORF12
	SmelB126	Rhizobiaceae	RNA7	684943	685043	-	NC_009621	Sinorhizobium medicae WSM419	366394	plasmid pSMED02	684593	684901	-	Smed_5711	CDS	hypothetical protein													686147	687076	-	Smed_5714	CDS	integrase catalytic region	ORF13			ORF14
	SmelB126	Rhizobiaceae	RNA8	1600556	1600657	+	CP002741	Sinorhizobium meliloti BL225C	698936	plasmid pSINMEB01	1598546	1600447	+	SinmeB_6696	CDS	potassium transporter													1601048	1602598	+	SinmeB_6697	CDS	Integrase catalytic region	ORF11			ORF15
	SmelB126	Rhizobiaceae	RNA9	921313	921414	+	NC_015591	Sinorhizobium meliloti AK83	693982	chromosome 3	919303	921204	+	Sinme_6201	CDS	potassium transporter													922183	922431	-	Sinme_6202	CDS	hypothetical protein	ORF11			ORF16
	SmelB126	Rhizobiaceae	RNA10	1938710	1938807	+	NC_009636	Sinorhizobium medicae WSM419	366394	chromosome	1937283	1938443	+	Smed_1864	CDS	alkyl hydroperoxide reductase/ Thiol specific antioxidant/ Mal allergen													1939190	1939555	-	Smed_1865	CDS	hypothetical protein	ORF17			ORF18
	SmelB126	Rhizobiaceae	RNA11	303840	303942	-	NC_015590	Sinorhizobium meliloti AK83	693982	chromosome 1	303442	303627	-	Sinme_0288	CDS	hypothetical protein													304293	305363	-	Sinme_0289	CDS	Redoxin domain-containing protein	ORF5			ORF17
	SmelB126	Rhizobiaceae	RNA12	33709	33824	-	NC_009622	Sinorhizobium medicae WSM419	366394	plasmid pSMED03	32353	33642	+	Smed_6369	CDS	polysaccharide biosynthesis protein													33890	35791	-	Smed_6370	CDS	K potassium transporter	ORF19			ORF11
	SmelB126	Rhizobiaceae	RNA13|SmelA060	1021535	1021640	+	NC_003037	Sinorhizobium meliloti 1021	266834	plasmid pSymA	1019529	1021430	+	SMa1798	CDS	Kup2 potassium uptake protein													1022056	1022561	-		repeat_region		ORF11			ORF20
23	SmelC023	Rhizobiaceae	SmelC023	201680	201825	+	NC_003047	Sinorhizobium meliloti 1021	266834	chromosome	198469	201483	-	SMc02850	CDS	DNA polymerase I													201956	202399	+	SMc02851	CDS	putative transcription regulator protein	ORF1			ORF2
	SmelC023	Rhizobiaceae	RNA1	3474416	3474562	+	CP002740	Sinorhizobium meliloti BL225C	698936	chromosome	3471205	3474219	-	SinmeB_3279	CDS	DNA polymerase I													3474692	3475135	+	SinmeB_3280	CDS	transcriptional regulator, MarR family	ORF1			ORF2
	SmelC023	Rhizobiaceae	RNA2	3621745	3621891	+	NC_015590	Sinorhizobium meliloti AK83	693982	chromosome 1	3618534	3621548	-	Sinme_3502	CDS	DNA polymerase I													3622022	3622465	+	Sinme_3503	CDS	MarR family transcriptional regulator	ORF1			ORF2
	SmelC023	Rhizobiaceae	RNA3	3585153	3585300	+	NC_009636	Sinorhizobium medicae WSM419	366394	chromosome	3581962	3584976	-	Smed_3381	CDS	DNA polymerase I													3585430	3585873	+	Smed_3382	CDS	MarR family transcriptional regulator	ORF1			ORF2
	SmelC023	Rhizobiaceae	RNA4	3727304	3727449	-	NC_012587	Sinorhizobium fredii NGR234	394	chromosome	3725266	3726657	-	NGR_c35130	CDS	hypothetical protein	3726775	3727434	-	NGR_c35140	CDS	putative transcriptional regulator, MarR family							3727551	3730673	+	NGR_c35150	CDS	DNA polymerase I	ORF3	ORF2		ORF1
	SmelC023	Rhizobiaceae	RNA5	205679	205821	-	NC_010994	Rhizobium etli CIAT 652	491916	chromosome	205143	205559	-	RHECIAT_CH0000189	CDS	probable transcriptional regulator protein, MarR family													205998	208991	+	RHECIAT_CH0000190	CDS	DNA polymerase I	ORF2			ORF1
	SmelC023	Rhizobiaceae	RNA6	255870	256018	+	NC_011989	Agrobacterium vitis S4	311402	chromosome 1	252729	255707	-	Avi_0299	CDS	DNA polymerase I													256094	256543	+	Avi_0300	CDS	transcriptional regulator MarR family	ORF1			ORF2
	SmelC023	Rhizobiaceae	RNA7	243241	243383	-	NC_011985	Agrobacterium radiobacter K84	311403	chromosome 1	242680	243111	-	Arad_0270	CDS	transcriptional regulator protein													243543	246545	+	Arad_0271	CDS	DNA polymerase I	ORF2			ORF1
	SmelC023	Rhizobiaceae	RNA8	4280521	4280663	-	NC_011369	Rhizobium leguminosarum bv. trifolii WSM2304	395492	chromosome	4279984	4280400	-	Rleg2_4102	CDS	transcriptional regulator, MarR family													4280807	4283806	+	Rleg2_4103	CDS	DNA polymerase I	ORF2			ORF1
	SmelC023	Rhizobiaceae	RNA9	163763	163907	-	NC_007761	Rhizobium etli CFN 42	347834	chromosome	163227	163643	-	RHE_CH00150	CDS	MarR family transcriptional regulator													164051	167050	+	RHE_CH00151	CDS	DNA polymerase I	ORF2			ORF1
	SmelC023	Rhizobiaceae	RNA10	4553565	4553707	-	NC_012850	Rhizobium leguminosarum bv. trifolii WSM1325	395491	chromosome	4553028	4553444	-	Rleg_4422	CDS	MarR family transcriptional regulator													4553938	4556988	+	Rleg_4423	CDS	DNA polymerase I	ORF2			ORF1
	SmelC023	Rhizobiaceae	RNA11	192621	192763	-	NC_008380	Rhizobium leguminosarum bv. viciae 3841	216596	chromosome	192083	192499	-	RL0159	CDS	MarR family transcriptional regulator protein													192994	196044	+	RL0160	CDS	DNA polymerase I	ORF2			ORF1
	SmelC023	Rhizobiaceae	RNA12	112537	112678	-	NC_003062	Agrobacterium tumefaciens str. C58	176299	chromosome circular	112000	112446	-	Atu0109	CDS	MarR family transcriptional regulator													112724	113134	-	Atu8081	CDS	hypothetical protein	ORF2			ORF4
	SmelC023	Rhizobiaceae	RNA13	112525	112664	-	NC_015183	Agrobacterium sp. H13-3	861208	chromosome	111988	112422	-	AGROH133_02963	CDS	transcriptional regulator, MarR family													112837	115824	+	AGROH133_02965	CDS	DNA polymerase I	ORF2			ORF1
	SmelC023	Phyllobacteriaceae	RNA14	4251582	4251722	+	NC_008254	Mesorhizobium sp. BNC1	266779	chromosome	4248490	4251426	-	Meso_3945	CDS	DNA polymerase I													4251731	4253149	-	Meso_3946	CDS	6-phosphogluconate dehydrogenase	ORF1			ORF5
	SmelC023	Phyllobacteriaceae	RNA15	2648246	2648389	-	NC_002678	Mesorhizobium loti MAFF303099	266835	chromosome	2646732	2648117	-	mll3297	CDS	hypothetical protein													2648514	2651525	+	mlr3298	CDS	DNA polymerase I	ORF3			ORF1
	SmelC023	Phyllobacteriaceae	RNA16	1781904	1782046	+	NC_014923	Mesorhizobium ciceri biovar biserrulae WSM1271	765698	chromosome	1778784	1781777	-	Mesci_1702	CDS	DNA polymerase I													1782152	1783537	+	Mesci_1703	CDS	peptidase M20	ORF1			ORF3
	SmelC023	Brucellaceae	RNA17	134557	134696	-	NC_012441	Brucella melitensis ATCC 23457	546272	chromosome I	132946	134361	-	BMEA_A0128	CDS	hypothetical protein	134592	134840	+	BMEA_A0129	CDS	hypothetical protein							134922	137858	+	BMEA_A0130	CDS	DNA polymerase I	ORF3	ORF5		ORF1
	SmelC023	Brucellaceae	RNA18	132318	132457	-	NC_007618	Brucella melitensis biovar Abortus 2308	359391	chromosome I	130707	132122	-	BAB1_0118	CDS	hypothetical protein	132275	132601	+	BAB1_0119	CDS	hypothetical protein							132683	135619	+	BAB1_0120	CDS	DNA polymerase I	ORF3	ORF5		ORF1
	SmelC023	Brucellaceae	RNA19	134910	135049	-	NC_010169	Brucella suis ATCC 23445	470137	chromosome I	133299	134714	-	BSUIS_A0126	CDS	hypothetical protein	134945	135193	+	BSUIS_A0127	CDS	hypothetical protein							135275	138211	+	BSUIS_A0128	CDS	DNA polymerase I	ORF3	ORF5		ORF1
	SmelC023	Brucellaceae	RNA20	135951	136090	-	NC_006932	Brucella abortus bv. 1 str. 9-941	262698	chromosome I	134340	135755	-	BruAb1_0118	CDS	hypothetical protein	135908	136234	+	BruAb1_0119	CDS	hypothetical protein							136316	139252	+	BruAb1_0120	CDS	DNA polymerase I	ORF3	ORF5		ORF1
	SmelC023	Brucellaceae	RNA21	134592	134731	-	NC_004310	Brucella suis 1330	204722	chromosome I	132981	134396	-	BR0121	CDS	hypothetical protein	134549	134875	+	BR0122	CDS	hypothetical protein							134957	137896	+	BR0123	CDS	DNA polymerase I	ORF3	ORF5		ORF1
	SmelC023	Brucellaceae	RNA22	134337	134476	-	NC_010742	Brucella abortus S19	430066	chromosome 1	132726	134141	-	BAbS19_I01130	CDS	hypothetical protein													134702	137638	+	BAbS19_I01140	CDS	DNA polymerase I	ORF3			ORF1
	SmelC023	Brucellaceae	RNA23	1868346	1868485	+	NC_003317	Brucella melitensis bv. 1 str. 16M	224914	chromosome I	1865184	1868168	-	BMEI1825	CDS	DNA polymerase I	1868202	1868450	-	BMEI1826	CDS	hypothetical protein							1868645	1870096	+	BMEI1827	CDS	hypothetical protein	ORF1	ORF5		ORF3
	SmelC023	Brucellaceae	RNA24	134575	134714	-	NC_010103	Brucella canis ATCC 23365	483179	chromosome I	132964	134379	-	BCAN_A0124	CDS	hypothetical protein	134610	134858	+	BCAN_A0125	CDS	hypothetical protein							134940	137879	+	BCAN_A0126	CDS	DNA polymerase I	ORF3	ORF5		ORF1
	SmelC023	Brucellaceae	RNA25	134890	135028	-	NC_009505	Brucella ovis ATCC 25840	444178	chromosome I	133280	134695	-	BOV_0118	CDS	hypothetical protein													135254	138190	+	BOV_0119	CDS	DNA polymerase I	ORF3			ORF1
	SmelC023	Brucellaceae	RNA26	136169	136308	-	NC_013119	Brucella microti CCM 4915	568815	chromosome 1	134558	135973	-	BMI_I124	CDS	hypothetical protein	136126	136452	+	BMI_I125	CDS	hypothetical protein							136534	139470	+	BMI_I126	CDS	DNA polymerase I	ORF3	ORF5		ORF1
	SmelC023	Brucellaceae	RNA27	149819	149961	-	NC_009667	Ochrobactrum anthropi ATCC 49188	439375	chromosome 1	148306	149715	-	Oant_0136	CDS	hypothetical protein													150127	153057	+	Oant_0137	CDS	DNA polymerase I	ORF3			ORF1
	SmelC023	Brucellaceae	RNA28	134548	134687	-	CP002459	Brucella melitensis M28	941967	chromosome 1	132937	134352	-	BM28_A0130	CDS	peptidase M20													134913	137849	+	BM28_A0131	CDS	DNA polymerase I	ORF3			ORF1
24	SmelC032	Rhizobiaceae	SmelC032	241172	241250	+	NC_003047	Sinorhizobium meliloti 1021	266834	chromosome	240021	241013	-	SMc02884	CDS	putative lipoprotein precursor													241298	241951	-	SMc02885	CDS	methionine sulfoxide reductase A	ORF1			ORF2
	SmelC032	Rhizobiaceae	RNA1	3513908	3513987	+	CP002740	Sinorhizobium meliloti BL225C	698936	chromosome	3512757	3513749	-	SinmeB_3313	CDS	basic membrane lipoprotein													3514034	3514687	-	SinmeB_3314	CDS	Peptide methionine sulfoxide reductase msrA	ORF1			ORF2
	SmelC032	Rhizobiaceae	RNA2	3661237	3661316	+	NC_015590	Sinorhizobium meliloti AK83	693982	chromosome 1	3660086	3661078	-	Sinme_3536	CDS	basic membrane lipoprotein													3661363	3662016	-	Sinme_3537	CDS	peptide methionine sulfoxide reductase msrA	ORF1			ORF2
25	SmelC055	Rhizobiaceae	SmelC055	360068	360127	-	NC_003047	Sinorhizobium meliloti 1021	266834	chromosome	359249	360055	+	SMc00408	CDS	undecaprenyl pyrophosphate phosphatase													360166	360327	-	SMc00409	CDS	putative signal peptide protein	ORF1			ORF2
	SmelC055	Rhizobiaceae	RNA1	3632820	3632880	-	CP002740	Sinorhizobium meliloti BL225C	698936	chromosome	3632002	3632808	+	SinmeB_3434	CDS	Undecaprenyl-diphosphatase													3632919	3633080	-	SinmeB_3435	CDS	hypothetical protein	ORF1			ORF2
	SmelC055	Rhizobiaceae	RNA2	3781311	3781371	-	NC_015590	Sinorhizobium meliloti AK83	693982	chromosome 1	3780493	3781299	+	Sinme_3658	CDS	Undecaprenyl-diphosphatase													3781410	3781571	-	Sinme_3659	CDS	hypothetical protein	ORF1			ORF2
	SmelC055	Rhizobiaceae	RNA3	3744754	3744814	-	NC_009636	Sinorhizobium medicae WSM419	366394	chromosome	3743936	3744742	+	Smed_3536	CDS	undecaprenyl pyrophosphate phosphatase													3744854	3745015	-	Smed_3537	CDS	putative signal peptide protein	ORF1			ORF2
	SmelC055	Rhizobiaceae	RNA4	3877705	3877768	-	NC_012587	Sinorhizobium fredii NGR234	394	chromosome	3876722	3877528	+	NGR_c36660	CDS	undecaprenyl pyrophosphate phosphatase													3877805	3877966	-	NGR_c36670	CDS	hypothetical protein	ORF1			ORF2
26	SmelC151	Rhizobiaceae	SmelC151	843452	843524	+	NC_003047	Sinorhizobium meliloti 1021	266834	chromosome	843040	843336	+	SMc00821	CDS	hypothetical protein													843615	843911	+	SMc00822	CDS	hypothetical protein	ORF1			ORF2
	SmelC151	Rhizobiaceae	RNA1	406310	406383	+	CP002740	Sinorhizobium meliloti BL225C	698936	chromosome	405898	406194	+	SinmeB_0380	CDS	hypothetical protein													406473	406769	+	SinmeB_0381	CDS	Protein of unknown function DUF2136	ORF1			ORF2
	SmelC151	Rhizobiaceae	RNA2	490071	490144	+	NC_015590	Sinorhizobium meliloti AK83	693982	chromosome 1	489659	489955	+	Sinme_0475	CDS	hypothetical protein													490234	490530	+	Sinme_0476	CDS	hypothetical protein	ORF1			ORF2
	SmelC151	Rhizobiaceae	RNA3	413467	413540	+	NC_009636	Sinorhizobium medicae WSM419	366394	chromosome	413060	413356	+	Smed_0385	CDS	hypothetical protein													413660	414505	-	Smed_0386	CDS	hypothetical protein	ORF1			ORF3
	SmelC151	Rhizobiaceae	RNA4	428608	428681	+	NC_012587	Sinorhizobium fredii NGR234	394	chromosome	428188	428484	+	NGR_c03830	CDS	hypothetical protein													428857	429675	-	NGR_c03840	CDS	hypothetical protein	ORF1			ORF3
	SmelC151	Rhizobiaceae	RNA5	827101	827176	+	NC_011985	Agrobacterium radiobacter K84	311403	chromosome 1	826787	827086	+	Arad_1015	CDS	hypothetical protein													827282	828967	+	Arad_1017	CDS	ABC transporter	ORF4			ORF5
	SmelC151	Rhizobiaceae	RNA6	505484	505562	+	NC_012850	Rhizobium leguminosarum bv. trifolii WSM1325	395491	chromosome	505173	505472	+	Rleg_0483	CDS	hypothetical protein													505632	506498	-	Rleg_0484	CDS	hypothetical protein	ORF4			ORF3
	SmelC151	Rhizobiaceae	RNA7	920283	920361	+	NC_008380	Rhizobium leguminosarum bv. viciae 3841	216596	chromosome	919969	920280	+	RL0852	CDS	hypothetical protein													920536	921402	-	RL0853	CDS	hypothetical protein	ORF4			ORF3
	SmelC151	Rhizobiaceae	RNA8	839625	839704	+	NC_007761	Rhizobium etli CFN 42	347834	chromosome	839315	839614	+	RHE_CH00801	CDS	hypothetical protein	839700	840566	-	RHE_CH00802	CDS	hypothetical protein							840665	842038	-	RHE_CH00803	CDS	glutamate-cysteine ligase protein	ORF4	ORF3		ORF6
	SmelC151	Rhizobiaceae	RNA9	897176	897255	+	NC_010994	Rhizobium etli CIAT 652	491916	chromosome	896865	897164	+	RHECIAT_CH0000886	CDS	hypothetical protein	897253	898134	-	RHECIAT_CH0000887	CDS	hypothetical protein							898283	899656	-	RHECIAT_CH0000888	CDS	gamma-glutamylcysteine synthetase protein	ORF4	ORF3		ORF6
	SmelC151	Rhizobiaceae	RNA10	450220	450299	+	NC_011369	Rhizobium leguminosarum bv. trifolii WSM2304	395492	chromosome	449909	450208	+	Rleg2_0439	CDS	protein of unknown function DUF1127	450297	451175	-	Rleg2_0440	CDS	hypothetical protein							451322	452695	-	Rleg2_0441	CDS	glutamate/cysteine ligase	ORF4	ORF3		ORF6
	SmelC151	Rhizobiaceae	RNA11	608849	608922	+	NC_015183	Agrobacterium sp. H13-3	861208	chromosome	608491	608784	+	AGROH133_04163	CDS	hypothetical protein													608992	610365	-	AGROH133_04164	CDS	glutamate-cysteine ligase	ORF7			ORF6
	SmelC151	Rhizobiaceae	RNA12	804049	804118	+	NC_011988	Agrobacterium vitis S4	311402	chromosome 2	803728	804027	+	Avi_5775	CDS	hypothetical protein													804163	805062	-	Avi_5777	CDS	hypothetical protein	ORF8			ORF3
	SmelC151	Rhizobiaceae	RNA13	649725	649798	+	NC_003062	Agrobacterium tumefaciens str. C58	176299	chromosome circular	649376	649669	+	Atu8135	CDS	hypothetical protein													649842	651215	-	Atu0656	CDS	glutamate-cysteine ligase	ORF7			ORF6
27	SmelC165	Rhizobiaceae	SmelC165	910182	910297	+	NC_003047	Sinorhizobium meliloti 1021	266834	chromosomeSmelC165	909133	909966	+	SMc00877	CDS	putative transcription regulator protein													910428	911582	+	SMc00876	CDS	putative MRP protein homolog ATP-binding	ORF1			ORF2
	SmelC165	Rhizobiaceae	RNA1	473038	473154	+	CP002740	Sinorhizobium meliloti BL225C	698936	chromosome	472067	472822	+	SinmeB_0441	CDS	transcriptional regulator													473284	474438	+	SinmeB_0442	CDS	ATPase-like	ParA/MinD	ORF1			ORF2
	SmelC165	Rhizobiaceae	RNA2	556797	556913	+	NC_015590	Sinorhizobium meliloti AK83	693982	chromosome 1	555748	556581	+	Sinme_0536	CDS	LuxR family transcriptional regulator													557043	558197	+	Sinme_0537	CDS	ATPase-like ParA/MinD	ORF1			ORF2
	SmelC165	Rhizobiaceae	RNA3	478575	478690	+	NC_009636	Sinorhizobium medicae WSM419	366394	chromosome	477535	478395	+	Smed_0441	CDS	regulatory protein LuxR													478800	479954	+	Smed_0442	CDS	hypothetical protein	ORF1			ORF2
	SmelC165	Rhizobiaceae	RNA4	493951	494077	+	NC_012587	Sinorhizobium fredii NGR234	394	chromosome	493000	493773	+	NGR_c04400	CDS	putative LuxR/GerE family transcriptional regulator													494233	495384	+	NGR_c04410	CDS	putative ATP-binding Mrp family protein	ORF1			ORF2
	SmelC165	Rhizobiaceae	RNA5	902040	902159	+	NC_011985	Agrobacterium radiobacter K84	311403	chromosome 1	901105	901842	+	Arad_1107	CDS	transcriptional regulator protein													902463	903620	+	Arad_1109	CDS	Mrp protein	ORF1			ORF2
	SmelC165	Rhizobiaceae	RNA6	778631	778730	+	NC_011989	Agrobacterium vitis S4	311402	chromosome 1	777059	778255	+	Avi_0919	CDS	ABC transporter nucleotide binding/ATPase protein													778842	780002	+	Avi_0923	CDS	mrp protein	ORF3			ORF2
	SmelC165	Rhizobiaceae	RNA7	572064	572181	+	NC_012850	Rhizobium leguminosarum bv. trifolii WSM1325	395491	chromosome	571190	571924	+	Rleg_0548	CDS	LuxR family transcriptional regulator													572458	573624	+	Rleg_0549	CDS	hypothetical protein	ORF1			ORF2
	SmelC165	Rhizobiaceae	RNA8	990532	990649	+	NC_008380	Rhizobium leguminosarum bv. viciae 3841	216596	chromosome	989655	990392	+	RL0919	CDS	LuxR/GerE family transcriptional regulator													990927	992087	+	RL0920	CDS	ATP-binding mrp family protein	ORF1			ORF2
	SmelC165	Rhizobiaceae	RNA9	899373	899490	+	NC_007761	Rhizobium etli CFN 42	347834	chromosome	898497	899243	+	RHE_CH00857	CDS	LuxR family transcriptional regulator	899391	899861	+	RHE_CH00858	CDS	hypothetical protein							899858	901027	+	RHE_CH00859	CDS	ATP-binding protein (Mrp protein-like)	ORF1	ORF2		ORF2
	SmelC165	Rhizobiaceae	RNA10	957126	957244	+	NC_010994	Rhizobium etli CIAT 652	491916	chromosome	956255	956995	+	RHECIAT_CH0000947	CDS	putative transcriptional regulator protein	957141	957503	+	RHECIAT_CH0000948	CDS	hypothetical protein							957529	958713	+	RHECIAT_CH0000949	CDS	hypothetical protein	ORF1	ORF2		ORF2
	SmelC165	Rhizobiaceae	RNA11	519931	520044	+	NC_011369	Rhizobium leguminosarum bv. trifolii WSM2304	395492	chromosome	519056	519790	+	Rleg2_0505	CDS	transcriptional regulator													520436	521620	+	Rleg2_0506	CDS	protein of unknown function DUF59	ORF1			ORF2
28	SmelC289	Rhizobiaceae	SmelC289	1398278	1398426	-	NC_003047	Sinorhizobium meliloti 1021	266834	chromosome	1397889	1398104	-	SMc01933	CDS	hypothetical protein													1398815	1400143	+	SMc01934	CDS	prolyl-tRNA synthetase	ORF1			ORF2
	SmelC289	Rhizobiaceae	RNA1	961028	961177	-	CP002740	Sinorhizobium meliloti BL225C	698936	chromosome	960640	960855	-	SinmeB_0912	CDS	helix-turn-helix protein, CopG													961566	962894	+	SinmeB_0913	CDS	Prolyl-tRNA synthetase	ORF1			ORF2
	SmelC289	Rhizobiaceae	RNA2	1096675	1096824	-	NC_015590	Sinorhizobium meliloti AK83	693982	chromosome 1	1096369	1096662	+	Sinme_1081	CDS	hypothetical protein													1097213	1098541	+	Sinme_1082	CDS	Prolyl-tRNA synthetase	ORF3			ORF2
	SmelC289	Rhizobiaceae	RNA3	979753	979903	-	NC_009636	Sinorhizobium medicae WSM419	366394	chromosome	979229	979498	+	Smed_0907	CDS	hypothetical protein													980177	981469	+	Smed_0908	CDS	FAD-dependent pyridine nucleotide-disulfide oxidoreductase	ORF4			ORF5
	SmelC289	Rhizobiaceae	RNA4	1130001	1130151	-	NC_012587	Sinorhizobium fredii NGR234	394	chromosome	1129571	1129840	+	NGR_c10670	CDS	putative transmembrane protein													1130367	1131872	+	NGR_c10680	CDS	prolyl-tRNA synthetase	ORF4			ORF2
	SmelC289	Rhizobiaceae	RNA5	1684929	1685073	-	NC_010994	Rhizobium etli CIAT 652	491916	chromosome	1684473	1684766	+	RHECIAT_CH0001694	CDS	hypothetical protein													1685356	1686678	+	RHECIAT_CH0001695	CDS	prolyl-tRNA synthetase	ORF4			ORF2
	SmelC289	Rhizobiaceae	RNA6	1296506	1296651	-	NC_011369	Rhizobium leguminosarum bv. trifolii WSM2304	395492	chromosome	1296067	1296342	+	Rleg2_1278	CDS	protein of unknown function DUF1467													1296935	1298257	+	Rleg2_1279	CDS	prolyl-tRNA synthetase	ORF4			ORF2
	SmelC289	Rhizobiaceae	RNA7	1354593	1354737	-	NC_012850	Rhizobium leguminosarum bv. trifolii WSM1325	395491	chromosome	1354155	1354430	+	Rleg_1370	CDS	hypothetical protein													1355021	1356343	+	Rleg_1371	CDS	prolyl-tRNA synthetase	ORF4			ORF2
	SmelC289	Rhizobiaceae	RNA8	1481975	1482120	-	NC_011985	Agrobacterium radiobacter K84	311403	chromosome 1	1481492	1481770	+	Arad_1869	CDS	hypothetical protein													1482307	1483734	+	Arad_1870	CDS	prolyl-tRNA synthetase	ORF4			ORF2
	SmelC289	Rhizobiaceae	RNA9	1802936	1803080	-	NC_008380	Rhizobium leguminosarum bv. viciae 3841	216596	chromosome	1802432	1802773	+	RL1718	CDS	transmembrane protein													1803364	1804686	+	RL1719	CDS	prolyl-tRNA synthetase	ORF4			ORF2
	SmelC289	Rhizobiaceae	RNA10	1703203	1703346	-	NC_007761	Rhizobium etli CFN 42	347834	chromosome	1702700	1703041	+	RHE_CH01622	CDS	hypothetical protein													1703629	1704951	+	RHE_CH01623	CDS	prolyl-tRNA synthetase	ORF4			ORF2
	SmelC289	Rhizobiaceae	RNA11	1275297	1275444	-	NC_003062	Agrobacterium tumefaciens str. C58	176299	chromosome circular	1274803	1275072	+	Atu1286	CDS	hypothetical protein	1275148	1275342	+	Atu1287	CDS	hypothetical protein							1275738	1277060	+	Atu1288	CDS	prolyl-tRNA synthetase	ORF4	ORF6		ORF2
	SmelC289	Rhizobiaceae	RNA12	1448510	1448660	-	NC_011989	Agrobacterium vitis S4	311402	chromosome 1	1448181	1448450	+	Avi_1737	CDS	hypothetical protein													1448895	1450391	+	Avi_1739	CDS	prolyl-tRNA synthetase	ORF4			ORF2
	SmelC289	Brucellaceae	RNA13	802077	802229	-	NC_013119	Brucella microti CCM 4915	568815	chromosome 1	801426	801695	+	BMI_I820	CDS	hypothetical protein	802053	802193	+	BMI_I821	CDS	hypothetical protein							802543	803871	+	BMI_I822	CDS	prolyl-tRNA synthetase	ORF4	ORF7		ORF2
	SmelC289	Brucellaceae	RNA14	819596	819748	-	NC_006932	Brucella abortus bv. 1 str. 9-941	262698	chromosome I	818945	819214	+	BruAb1_0833	CDS	hypothetical protein	819572	819712	+	BruAb1_0834	CDS	hypothetical protein	819743	819835	+	BruAb1_0835	CDS	hypothetical protein	820062	821390	+	BruAb1_0836	CDS	prolyl-tRNA synthetase	ORF4	ORF7	ORF8	ORF2
	SmelC289	Brucellaceae	RNA15	815874	816026	-	NC_007618	Brucella melitensis biovar Abortus 2308	359391	chromosome I	815223	815492	+	BAB1_0839	CDS	hypothetical protein	815850	815990	+	BAB1_0840	CDS	hypothetical protein	816021	816113	+	BAB1_0841	CDS	hypothetical protein	816340	817668	+	BAB1_0842	CDS	prolyl-tRNA synthetase	ORF4	ORF7	ORF8	ORF2
	SmelC289	Brucellaceae	RNA16	1187592	1187744	+	NC_003317	Brucella melitensis bv. 1 str. 16M	224914	chromosome I	1185950	1187287	-	BMEI1140	CDS	prolyl-tRNA synthetase													1188126	1188395	-	BMEI1141	CDS	hypothetical protein	ORF2			ORF4
	SmelC289	Brucellaceae	RNA17	817761	817913	-	NC_010169	Brucella suis ATCC 23445	470137	chromosome I	817110	817379	+	BSUIS_A0858	CDS	hypothetical protein	817737	817877	+	BSUIS_A0859	CDS	hypothetical protein	817908	818000	+	BSUIS_A0860	CDS	hypothetical protein	818227	819555	+	BSUIS_A0861	CDS	prolyl-tRNA synthetase	ORF4	ORF7	ORF8	ORF2
	SmelC289	Brucellaceae	RNA18	817897	818049	-	NC_010742	Brucella abortus S19	430066	chromosome 1	817246	817515	+	BAbS19_I07830	CDS	hypothetical protein													818363	819691	+	BAbS19_I07840	CDS	prolyl-tRNA synthetase	ORF4			ORF2
	SmelC289	Brucellaceae	RNA19	796280	796432	-	NC_010103	Brucella canis ATCC 23365	483179	chromosome I	795629	795898	+	BCAN_A0834	CDS	hypothetical protein	796256	796396	+	BCAN_A0835	CDS	hypothetical protein	796427	796519	+	BCAN_A0836	CDS	hypothetical protein	796746	798074	+	BCAN_A0837	CDS	prolyl-tRNA synthetase	ORF4	ORF7	ORF8	ORF2
	SmelC289	Brucellaceae	RNA20	822711	822863	-	NC_009505	Brucella ovis ATCC 25840	444178	chromosome I	822060	822329	+	BOV_0814	CDS	hypothetical protein	822687	822827	+	BOV_0815	CDS	hypothetical protein							823177	824505	+	BOV_0816	CDS	prolyl-tRNA synthetase	ORF4	ORF7		ORF2
	SmelC289	Brucellaceae	RNA21	797916	798068	-	NC_004310	Brucella suis 1330	204722	chromosome I	797265	797534	+	BR0819	CDS	hypothetical protein	797892	798032	+	BR0820	CDS	hypothetical protein	798063	798155	+	BR0821	CDS	hypothetical protein	798382	799710	+	BR0822	CDS	prolyl-tRNA synthetase	ORF4	ORF7	ORF8	ORF2
	SmelC289	Brucellaceae	RNA22	819376	819527	-	NC_012441	Brucella melitensis ATCC 23457	546272	chromosome I	818725	818994	+	BMEA_A0861	CDS	hypothetical protein													819842	821170	+	BMEA_A0862	CDS	prolyl-tRNA synthetase	ORF4			ORF2
	SmelC289	Brucellaceae	RNA23	2529104	2529256	+	NC_009667	Ochrobactrum anthropi ATCC 49188	439375	chromosome 1	2527462	2528790	-	Oant_2405	CDS	prolyl-tRNA synthetase													2529594	2529863	-	Oant_2406	CDS	hypothetical protein	ORF2			ORF4
	SmelC289	Phyllobacteriaceae	RNA24	3449637	3449790	-	NC_014923	Mesorhizobium ciceri biovar biserrulae WSM1271	765698	chromosome	3449215	3449499	+	Mesci_3302	CDS	protein of unknown function DUF1467													3450133	3451461	+	Mesci_3303	CDS	prolyl-tRNA synthetase	ORF4			ORF2
	SmelC289	Phyllobacteriaceae	RNA25	1127213	1127365	+	NC_002678	Mesorhizobium loti MAFF303099	266835	chromosome	1125520	1126848	-	mll1344	CDS	prolyl-tRNA synthetase													1127503	1127787	-	msl1345	CDS	hypothetical protein	ORF2			ORF4
	SmelC289	Phyllobacteriaceae	RNA26	1141775	1141934	-	NC_008254	Mesorhizobium sp. BNC1	266779	chromosome	1141489	1141758	+	Meso_1039	CDS	hypothetical protein													1142139	1143467	+	Meso_1040	CDS	prolyl-tRNA synthetase	ORF4			ORF2
	SmelC289	Rhizobiaceae	RNA27	1215581	1215727	-	NC_015183	Agrobacterium sp. H13-3	861208	chromosome	1215032	1215337	+	AGROH133_05703	CDS	hypothetical protein													1215911	1217344	+	AGROH133_05706	CDS	Prolyl-tRNA synthetase	ORF4			ORF2
	SmelC289	Brucellaceae	RNA28	819322	819472	-	CP002459	Brucella melitensis M28	941967	chromosome 1	818670	818939	+	BM28_A0831	CDS	conserved hypothetical protein													819702	819815	-	BM28_A0832	CDS	conserved hypothetical protein	ORF4			ORF9
29	SmelC291	Rhizobiaceae	SmelC291	1411707	1411811	+	NC_003047	Sinorhizobium meliloti 1021	266834	chromosome	1410107	1411474	+	SMc01370	CDS	response regulator PleD													1411961	1412128	-	SMc01369	CDS	50S ribosomal protein L33	ORF1			ORF2
	SmelC291	Rhizobiaceae	RNA1	974458	974563	+	CP002740	Sinorhizobium meliloti BL225C	698936	chromosome	972858	974225	+	SinmeB_0921	CDS	response regulator receiver modulated diguanylate cyclase													974712	974879	-	SinmeB_0922	CDS	50S ribosomal protein L33	ORF1			ORF2
	SmelC291	Rhizobiaceae	RNA2	1110091	1110196	+	NC_015590	Sinorhizobium meliloti AK83	693982	chromosome 1	1108491	1109858	+	Sinme_1090	CDS	response regulator receiver modulated diguanylate cyclase													1110345	1110512	-	Sinme_1091	CDS	50S ribosomal protein L33	ORF1			ORF2
	SmelC291	Rhizobiaceae	RNA3	1002551	1002657	+	NC_009636	Sinorhizobium medicae WSM419	366394	chromosome	1000965	1002332	+	Smed_0926	CDS	response regulator PleD													1002858	1003025	-	Smed_0927	CDS	50S ribosomal protein L33	ORF1			ORF2
	SmelC291	Rhizobiaceae	RNA4	1145515	1145624	+	NC_012587	Sinorhizobium fredii NGR234	394	chromosome	1143851	1145218	+	NGR_c10800	CDS	response regulator PleD													1145791	1145958	-	NGR_c10810	CDS	50S ribosomal protein L33	ORF1			ORF2
	SmelC291	Rhizobiaceae	RNA5	1499310	1499418	+	NC_011985	Agrobacterium radiobacter K84	311403	chromosome 1	1497408	1498784	+	Arad_1885	CDS	response regulator PleD													1499607	1499774	-	Arad_1886	CDS	50S ribosomal protein L33	ORF1			ORF2
	SmelC291	Rhizobiaceae	RNA6	1369771	1369879	+	NC_012850	Rhizobium leguminosarum bv. trifolii WSM1325	395491	chromosome	1367904	1369277	+	Rleg_1382	CDS	response regulator PleD													1370025	1370192	-	Rleg_1383	CDS	50S ribosomal protein L33	ORF1			ORF2
	SmelC291	Rhizobiaceae	RNA7	1818019	1818127	+	NC_008380	Rhizobium leguminosarum bv. viciae 3841	216596	chromosome	1816150	1817523	+	RL1730	CDS	response regulator PleD													1818274	1818441	-	RL1731	CDS	50S ribosomal protein L33	ORF1			ORF2
	SmelC291	Rhizobiaceae	RNA8	1311566	1311674	+	NC_011369	Rhizobium leguminosarum bv. trifolii WSM2304	395492	chromosome	1309698	1311071	+	Rleg2_1290	CDS	response regulator PleD													1311818	1311985	-	Rleg2_1291	CDS	50S ribosomal protein L33	ORF1			ORF2
	SmelC291	Rhizobiaceae	RNA9	1700123	1700231	+	NC_010994	Rhizobium etli CIAT 652	491916	chromosome	1698252	1699625	+	RHECIAT_CH0001706	CDS	response regulator PleD													1700375	1700542	-	RHECIAT_CH0001707	CDS	50S ribosomal protein L33	ORF1			ORF2
	SmelC291	Rhizobiaceae	RNA10	1718334	1718442	+	NC_007761	Rhizobium etli CFN 42	347834	chromosome	1716464	1717837	+	RHE_CH01633	CDS	response regulator PleD													1718586	1718753	-	RHE_CH01634	CDS	50S ribosomal protein L33	ORF1			ORF2
	SmelC291	Rhizobiaceae	RNA11	1228845	1228953	+	NC_015183	Agrobacterium sp. H13-3	861208	chromosome	1227048	1228418	+	AGROH133_05719	CDS	Response regulator pleD													1229299	1229466	-	AGROH133_05720	CDS	50S ribosomal protein L33	ORF1			ORF2
	SmelC291	Rhizobiaceae	RNA12	1288586	1288691	+	NC_003062	Agrobacterium tumefaciens str. C58	176299	chromosome circular	1288164	1288403	+	Atu1298	CDS	hypothetical protein													1289076	1289243	-	Atu1299	CDS	50S ribosomal protein L33	ORF1			ORF2
	SmelC291	Rhizobiaceae	RNA13	1463226	1463336	+	NC_011989	Agrobacterium vitis S4	311402	chromosome 1	1461199	1462572	+	Avi_1750	CDS	response regulator PleD													1463612	1463779	-	Avi_1751	CDS	50S ribosomal protein L33	ORF1			ORF2
	SmelC291	Phyllobacteriaceae	RNA14	1442043	1442151	+	NC_008254	Mesorhizobium sp. BNC1	266779	chromosome	1441582	1441869	+	Meso_1349	CDS	hypothetical protein													1442290	1442457	-	Meso_1350	CDS	50S ribosomal protein L33	ORF3			ORF2
	SmelC291	Phyllobacteriaceae	RNA15	4296872	4296981	-	NC_014923	Mesorhizobium ciceri biovar biserrulae WSM1271	765698	chromosome	4295159	4296631	-	Mesci_4155	CDS	monooxygenase FAD-binding protein	4296913	4297107	+	Mesci_4156	CDS	hypothetical protein							4297152	4298525	-	Mesci_4157	CDS	diguanylate cyclase	ORF4	ORF5		ORF1
	SmelC291	Phyllobacteriaceae	RNA16	685937	686046	-	NC_002678	Mesorhizobium loti MAFF303099	266835	chromosome	684236	685786	-	mll0858	CDS	hypothetical protein													686216	687589	-	mll0859	CDS	response regulator PleD	ORF4			ORF1
	SmelC291	Beijerinckiaceae	RNA17	466473	466580	+	NC_011666	Methylocella silvestris BL2	395965	chromosome	464878	466287	+	Msil_0424	CDS	response regulator receiver modulated diguanylate cyclase													466620	468716	-	Msil_0425	CDS	DNA topoisomerase IV subunit B	ORF1			ORF6
	SmelC291	Xanthobacteraceae	RNA18	1561100	1561203	+	NC_014217	Starkeya novella DSM 506	639283	chromosome	1560641	1561012	+	Snov_1506	CDS	response regulator receiver protein													1561418	1561585	-	Snov_1507	CDS	ribosomal protein L33	ORF7			ORF2
	SmelC291	Beijerinckiaceae	RNA19	1408693	1408802	+	NC_010581	Beijerinckia indica subsp. indica ATCC 9039	395963	chromosome	1407058	1408431	+	Bind_1213	CDS	response regulator receiver modulated diguanylate cyclase													1408852	1410159	-	Bind_1214	CDS	beta-lactamase	ORF1			ORF8
	SmelC291	Xanthobacteraceae	RNA20	4276631	4276735	+	NC_009720	Xanthobacter autotrophicus Py2	78245	chromosome	4276091	4276465	+	Xaut_3859	CDS	response regulator receiver protein													4276899	4277066	-	Xaut_3860	CDS	50S ribosomal protein L33	ORF7			ORF2
	SmelC291	Xanthobacteraceae	RNA21	2121548	2121654	+	NC_009937	Azorhizobium caulinodans ORS 571	438753	chromosome	2120963	2121412	+	AZC_1854	CDS	response regulator receiver													2121808	2121975	-	AZC_1855	CDS	50S ribosomal protein L33	ORF7			ORF2
	SmelC291	Hyphomicrobiaceae	RNA22	3129404	3129519	-	NC_014664	Rhodomicrobium vannielii ATCC 17100	648757	chromosome	3129095	3129262	+	Rvan_2870	CDS	ribosomal protein L33													3129776	3130153	-	Rvan_2871	CDS	response regulator receiver protein	ORF2			ORF7
30	SmelC416	Rhizobiaceae	SmelC416	1718814	1718919	-	NC_003047	Sinorhizobium meliloti 1021	266834	chromosome	1718412	1718585	-	SMc01210	CDS	hypothetical protein													1719314	1719805	+	SMc01209	CDS	phosphopantetheine adenylyltransferase	ORF1			ORF2
	SmelC416	Rhizobiaceae	RNA1	1332419	1332525	-	CP002740	Sinorhizobium meliloti BL225C	698936	chromosome	1329344	1330747	+	SinmeB_1249	CDS	MATE efflux family protein													1332563	1332694	-	SinmeB_1252	CDS	hypothetical protein	ORF3			ORF4
	SmelC416	Rhizobiaceae	RNA2	1488153	1488259	-	NC_015590	Sinorhizobium meliloti AK83	693982	chromosome 1	1486124	1487527	+	Sinme_1476	CDS	MATE efflux family protein													1488297	1488428	-	Sinme_1479	CDS	hypothetical protein	ORF3			ORF4
	SmelC416	Rhizobiaceae	RNA3	1358381	1358491	-	NC_009636	Sinorhizobium medicae WSM419	366394	chromosome	1356867	1358270	+	Smed_1263	CDS	MATE efflux family protein													1358823	1359368	+	Smed_1264	CDS	phosphopantetheine adenylyltransferase	ORF3			ORF2
	SmelC416	Rhizobiaceae	RNA4	1633045	1633153	-	NC_012587	Sinorhizobium fredii NGR234	394	chromosome	1631503	1632903	+	NGR_c15800	CDS	predicted multidrug efflux protein													1633558	1634052	+	NGR_c15810	CDS	phosphopantetheine adenylyltransferase	ORF3			ORF2
31	SmelC434	Rhizobiaceae	SmelC434	1821211	1821366	+	NC_003047	Sinorhizobium meliloti 1021	266834	chromosome	1820813	1821076	+	SMc00251	CDS	hypothetical protein													1821862	1822161	-	SMc00252	CDS	putative signal peptide protein	ORF1			ORF2
	SmelC434	Rhizobiaceae	RNA1	1486487	1486643	+	CP002740	Sinorhizobium meliloti BL225C	698936	chromosome	1486089	1486352	+	SinmeB_1427	CDS	hypothetical protein													1486823	1487062	+	SinmeB_1428	CDS	hypothetical protein	ORF1			ORF3
	SmelC434	Rhizobiaceae	RNA2	1588361	1588517	+	NC_015590	Sinorhizobium meliloti AK83	693982	chromosome 1	1587963	1588226	+	Sinme_1584	CDS	hypothetical protein													1588697	1588936	+	Sinme_1585	CDS	hypothetical protein	ORF1			ORF3
	SmelC434	Rhizobiaceae	RNA3	2390882	2391039	+	NC_012586	Sinorhizobium fredii NGR234	394	plasmid pNGR234b	2390455	2390613	+	NGR_b23220	CDS	hypothetical protein	2390591	2390935	-	NGR_b23230	CDS	hypothetical protein							2391096	2392100	-	NGR_b23240	CDS	succinylglutamate desuccinylase/aspartoacylase family protein	ORF4	ORF5		ORF6
32	SmelC500	Rhizobiaceae	SmelC500	2180102	2180274	-	NC_003047	Sinorhizobium meliloti 1021	266834	chromosome	2178679	2179041	-	SMc04191	CDS	hypothetical protein													2180366	2180518	-		repeat_region		ORF1			ORF2
	SmelC500	Rhizobiaceae	RNA1	1894801	1894974	-	CP002740	Sinorhizobium meliloti BL225C	698936	chromosome	1893917	1894357	+	SinmeB_1838	CDS	hypothetical protein	1894377	1894973	+	SinmeB_1839	CDS	hypothetical protein							1895731	1895928	+	SinmeB_1840	CDS	putative transmembrane protein	ORF3	ORF3		ORF4
	SmelC500	Rhizobiaceae	RNA2	1995152	1995325	-	NC_015590	Sinorhizobium meliloti AK83	693982	chromosome 1	1994268	1994708	+	Sinme_1995	CDS	hypothetical protein	1994728	1995324	+	Sinme_1996	CDS	hypothetical protein							1996082	1996279	+	Sinme_1997	CDS	putative transmembrane protein	ORF3	ORF3		ORF4
	SmelC500	Rhizobiaceae	RNA3	1921654	1921829	-	NC_009636	Sinorhizobium medicae WSM419	366394	chromosome	1920524	1920961	+	Smed_1844	CDS	hypothetical protein	1921133	1921708	-	Smed_1845	CDS	hypothetical protein							1922170	1922970	-	Smed_1846	CDS	IstB ATP binding domain-containing protein	ORF3	ORF5		ORF6
	SmelC500	Rhizobiaceae	RNA4	1965782	1965952	-	NC_012587	Sinorhizobium fredii NGR234	394	chromosome	1965126	1965569	+	NGR_c19100	CDS	hypothetical protein													1966539	1966811	+	NGR_c19110	CDS	hypothetical protein	ORF3			ORF4
33	SmelC507	Rhizobiaceae	SmelC507	2206348	2206577	+	NC_003047	Sinorhizobium meliloti 1021	266834	chromosome	2204782	2206116	-	SMc04280	CDS	putative signal peptide protein													2206649	2208388	-	SMc04283	CDS	putative transmembrane protein	ORF1			ORF2
	SmelC507	Rhizobiaceae	RNA1	1919758	1919988	+	CP002740	Sinorhizobium meliloti BL225C	698936	chromosome	1918192	1919526	-	SinmeB_1864	CDS	hypothetical protein													1920059	1921798	-	SinmeB_1865	CDS	TRAP C4-dicarboxylate transport system permease DctM subunit	ORF1			ORF2
	SmelC507	Rhizobiaceae	RNA2	2020109	2020338	+	NC_015590	Sinorhizobium meliloti AK83	693982	chromosome 1	2018543	2019877	-	Sinme_2021	CDS	hypothetical protein													2020409	2022148	-	Sinme_2022	CDS	TRAP C4-dicarboxylate transport system permease subunit DctM	ORF1			ORF2
	SmelC507	Rhizobiaceae	RNA3	1990105	1990333	+	NC_009636	Sinorhizobium medicae WSM419	366394	chromosome	1989467	1989847	-	Smed_1938	CDS	putative signal peptide protein													1990358	1992097	-	Smed_1939	CDS	TRAP C4-dicarboxylate transport system permease DctM subunit	ORF1			ORF2
	SmelC507	Rhizobiaceae	RNA4	1992953	1993188	+	NC_012587	Sinorhizobium fredii NGR234	394	chromosome	1991612	1992781	+	NGR_c19410	CDS	hypothetical protein													1993220	1994959	-	NGR_c19420	CDS	possible TRAP C4-dicarboxylate transport system permeaseDctM subunit	ORF3			ORF2
34	SmelC549	Rhizobiaceae	SmelC549	2371597	2371853	+	NC_003047	Sinorhizobium meliloti 1021	266834	chromosome	2370399	2371343	+	SMc01844	CDS	hypothetical protein													2371885	2372826	-	SMc01843	CDS	5,10-methylenetetrahydrofolate reductase oxidoreductase protein	ORF1			ORF2
	SmelC549	Rhizobiaceae	RNA1	2085178	2085435	+	CP002740	Sinorhizobium meliloti BL225C	698936	chromosome	2083980	2084924	+	SinmeB_2022	CDS	protein of unknown function DUF6 transmembrane													2085466	2086407	-	SinmeB_2023	CDS	5,10-methylenetetrahydrofolate reductase	ORF1			ORF2
	SmelC549	Rhizobiaceae	RNA2	2184144	2184401	+	NC_015590	Sinorhizobium meliloti AK83	693982	chromosome 1	2182946	2183890	+	Sinme_2178	CDS	hypothetical protein													2184432	2185373	-	Sinme_2179	CDS	5,10-methylenetetrahydrofolate reductase	ORF1			ORF2
	SmelC549	Rhizobiaceae	RNA3	2177496	2177740	+	NC_009636	Sinorhizobium medicae WSM419	366394	chromosome	2176299	2177243	+	Smed_2114	CDS	hypothetical protein													2177773	2178714	-	Smed_2115	CDS	5,10-methylenetetrahydrofolate reductase	ORF1			ORF2
	SmelC549	Rhizobiaceae	RNA4	2196077	2196327	+	NC_012587	Sinorhizobium fredii NGR234	394	chromosome	2194913	2195851	+	NGR_c21300	CDS	putative transmembrane component of ABC transporter													2196449	2197381	-	NGR_c21310	CDS	5,10-methylenetetrahydrofolate reductase	ORF1			ORF2
35	SmelC601	Rhizobiaceae	SmelC601	2625314	2625439	-	NC_003047	Sinorhizobium meliloti 1021	266834	chromosome	2624350	2625144	+	SMc01504	CDS	two-component response regulator													2625527	2627110	-	SMc01503	CDS	putative sugar kinase protein	ORF1			ORF2
	SmelC601	Rhizobiaceae	RNA1	2336320	2336446	-	CP002740	Sinorhizobium meliloti BL225C	698936	chromosome	2335357	2336151	+	SinmeB_2263	CDS	response regulator receiver	2336366	2336527	-	SinmeB_2264	CDS	hypothetical protein							2336534	2338117	-	SinmeB_2265	CDS	FGGY-family pentulose kinase	ORF1	ORF3		ORF2
	SmelC601	Rhizobiaceae	RNA2	2483065	2483191	-	NC_015590	Sinorhizobium meliloti AK83	693982	chromosome 1	2482102	2482896	+	Sinme_2484	CDS	response regulator receiver	2483111	2483272	-	Sinme_2485	CDS	hypothetical protein							2483279	2484862	-	Sinme_2486	CDS	FGGY-family pentulose kinase	ORF1	ORF3		ORF2
	SmelC601	Rhizobiaceae	RNA3	2425903	2426029	-	NC_009636	Sinorhizobium medicae WSM419	366394	chromosome	2424961	2425857	+	Smed_2350	CDS	LysR family transcriptional regulator													2426114	2427700	-	Smed_2351	CDS	FGGY-family pentulose kinase	ORF4			ORF2
	SmelC601	Rhizobiaceae	RNA4	2560950	2561075	-	NC_012587	Sinorhizobium fredii NGR234	394	chromosome	2560066	2560860	+	NGR_c24660	CDS	two-component response regulator													2561130	2562713	-	NGR_c24670	CDS	ribulokinase	ORF1			ORF2
36	SmelC671	Rhizobiaceae	SmelC671	2986421	2986521	+	NC_003047	Sinorhizobium meliloti 1021	266834	chromosome	2986144	2986332	+	SMc03988	CDS	hypothetical protein													2986696	2987286	+	SMc03989	CDS	hypothetical protein	ORF1			ORF2
	SmelC671	Rhizobiaceae	RNA1	2695767	2695868	+	CP002740	Sinorhizobium meliloti BL225C	698936	chromosome	2695490	2695678	+	SinmeB_2603	CDS	protein of unknown function DUF1192													2696042	2696560	+	SinmeB_2604	CDS	protein of unknown function DUF1465	ORF1			ORF2
	SmelC671	Rhizobiaceae	RNA2	2843884	2843985	+	NC_015590	Sinorhizobium meliloti AK83	693982	chromosome 1	2843607	2843795	+	Sinme_2827	CDS	hypothetical protein													2844159	2844677	+	Sinme_2828	CDS	hypothetical protein	ORF1			ORF2
	SmelC671	Rhizobiaceae	RNA3	2764684	2764786	+	NC_009636	Sinorhizobium medicae WSM419	366394	chromosome	2764243	2764431	+	Smed_2659	CDS	hypothetical protein													2764959	2765477	+	Smed_2660	CDS	hypothetical protein	ORF1			ORF2
	SmelC671	Rhizobiaceae	RNA4	2934782	2934883	+	NC_012587	Sinorhizobium fredii NGR234	394	chromosome	2934518	2934706	+	NGR_c28150	CDS	hypothetical protein													2935055	2935573	+	NGR_c28160	CDS	hypothetical protein	ORF1			ORF2
	SmelC671	Rhizobiaceae	RNA5	3039448	3039549	+	NC_011989	Agrobacterium vitis S4	311402	chromosome 1	3039107	3039301	+	Avi_3662	CDS	hypothetical protein													3039710	3040225	+	Avi_3663	CDS	hypothetical protein	ORF3			ORF2
	SmelC671	Rhizobiaceae	RNA6	824764	824865	+	NC_003063	Agrobacterium tumefaciens str. C58	176299	chromosome linear	823147	824436	+	Atu3741	CDS	MFS permease													825027	825542	+	Atu3742	CDS	hypothetical protein	ORF1			ORF2
	SmelC671	Rhizobiaceae	RNA7	1225239	1225340	+	NC_015508	Agrobacterium sp. H13-3	861208	chromosome linear	1224906	1225097	+	AGROH133_12087	CDS	hypothetical protein													1225503	1226018	+	AGROH133_12088	CDS	hypothetical protein	ORF1			ORF2
	SmelC671	Rhizobiaceae	RNA8	2989536	2989638	+	NC_011985	Agrobacterium radiobacter K84	311403	chromosome 1	2989197	2989388	+	Arad_3742	CDS	hypothetical protein													2989814	2990326	+	Arad_3745	CDS	hypothetical protein	ORF1			ORF2
	SmelC671	Rhizobiaceae	RNA9	3579398	3579500	+	NC_012850	Rhizobium leguminosarum bv. trifolii WSM1325	395491	chromosome	3579093	3579284	+	Rleg_3543	CDS	hypothetical protein													3579676	3580191	+	Rleg_3544	CDS	hypothetical protein	ORF1			ORF2
	SmelC671	Rhizobiaceae	RNA10	4244635	4244737	+	NC_008380	Rhizobium leguminosarum bv. viciae 3841	216596	chromosome	4244330	4244521	+	RL4015	CDS	hypothetical protein													4244928	4245428	+	RL4016	CDS	hypothetical protein	ORF1			ORF2
	SmelC671	Rhizobiaceae	RNA11	3692884	3692986	+	NC_007761	Rhizobium etli CFN 42	347834	chromosome	3692578	3692769	+	RHE_CH03504	CDS	hypothetical protein													3693161	3693676	+	RHE_CH03505	CDS	hypothetical protein	ORF1			ORF2
	SmelC671	Rhizobiaceae	RNA12	3336499	3336601	+	NC_011369	Rhizobium leguminosarum bv. trifolii WSM2304	395492	chromosome	3336195	3336386	+	Rleg2_3246	CDS	protein of unknown function DUF1192													3336777	3337292	+	Rleg2_3247	CDS	protein of unknown function DUF1465	ORF1			ORF2
	SmelC671	Rhizobiaceae	RNA13	3784402	3784504	+	NC_010994	Rhizobium etli CIAT 652	491916	chromosome	3784098	3784289	+	RHECIAT_CH0003747	CDS	hypothetical protein													3784679	3785194	+	RHECIAT_CH0003748	CDS	hypothetical protein	ORF1			ORF2
	SmelC671	Brucellaceae	RNA14	1280698	1280815	+	NC_009667	Ochrobactrum anthropi ATCC 49188	439375	chromosome 1	1279367	1280590	+	Oant_1209	CDS	OpgC protein													1281140	1281667	+	Oant_1210	CDS	hypothetical protein	ORF4			ORF2
	SmelC671	Brucellaceae	RNA15	1655671	1655766	-	NC_009505	Brucella ovis ATCC 25840	444178	chromosome I	1654860	1655552	-	BOV_1648	CDS	hypothetical protein													1655854	1657035	-	BOV_1649	CDS	putative opgC protein	ORF2			ORF4
	SmelC671	Brucellaceae	RNA16	1668009	1668104	-	CP002459	Brucella melitensis M28	941967	chromosome 1	1667198	1667827	-	BM28_A1707	CDS	conserved hypothetical protein													1668192	1669394	-	BM28_A1708	CDS	OPGC protein	ORF2			ORF4
	SmelC671	Brucellaceae	RNA17	1656320	1656415	-	NC_013119	Brucella microti CCM 4915	568815	chromosome 1	1655509	1656015	-	BMI_I1725	CDS	hypothetical protein													1657916	1658581	+	BMI_I1727	CDS	thiamine-phosphate pyrophosphorylase	ORF2			ORF5
	SmelC671	Brucellaceae	RNA18	1155835	1155930	-	NC_010167	Brucella suis ATCC 23445	470137	chromosome II	1155024	1155530	-	BSUIS_B1181	CDS	hypothetical protein													1156018	1157199	-	BSUIS_B1182	CDS	hypothetical protein	ORF2			ORF4
	SmelC671	Brucellaceae	RNA19	1667559	1667654	-	NC_012441	Brucella melitensis ATCC 23457	546272	chromosome I	1666748	1667254	-	BMEA_A1758	CDS	hypothetical protein													1667742	1668923	-	BMEA_A1759	CDS	hypothetical protein	ORF2			ORF4
	SmelC671	Brucellaceae	RNA20	1646765	1646860	-	NC_010103	Brucella canis ATCC 23365	483179	chromosome I	1645954	1646460	-	BCAN_A1744	CDS	hypothetical protein													1646948	1648129	-	BCAN_A1745	CDS	hypothetical protein	ORF2			ORF4
	SmelC671	Brucellaceae	RNA21	340380	340475	+	NC_003317	Brucella melitensis bv. 1 str. 16M	224914	chromosome I	339090	340292	+	BMEI0330	CDS	OPGC													340759	341286	+	BMEI0331	CDS	hypothetical protein	ORF4			ORF2
	SmelC671	Brucellaceae	RNA22	1662858	1662953	-	NC_007618	Brucella melitensis biovar Abortus 2308	359391	chromosome I	1662048	1662554	-	BAB1_1717	CDS	hypothetical protein													1663041	1664222	-	BAB1_1718	CDS	general secretion pathway protein H	ORF2			ORF4
	SmelC671	Brucellaceae	RNA23	1665701	1665796	-	NC_006932	Brucella abortus bv. 1 str. 9-941	262698	chromosome I	1664891	1665397	-	BruAb1_1690	CDS	hypothetical protein													1665884	1667086	-	BruAb1_1691	CDS	hypothetical protein	ORF2			ORF4
	SmelC671	Brucellaceae	RNA24	1664023	1664118	-	NC_010742	Brucella abortus S19	430066	chromosome 1	1663213	1663905	-	BAbS19_I16050	CDS	hypothetical protein													1664206	1665408	-	BAbS19_I16060	CDS	OPGC	ORF2			ORF4
	SmelC671	Phyllobacteriaceae	RNA25	3451741	3451837	-	NC_008254	Mesorhizobium sp. BNC1	266779	chromosome	3451073	3451603	-	Meso_3180	CDS	hypothetical protein													3452041	3452814	-	Meso_3181	CDS	hypothetical protein	ORF2			ORF6
	SmelC671	Brucellaceae	RNA26	1648777	1648872	-	NC_004310	Brucella suis 1330	204722	chromosome I	1647967	1648473	-	BR1705	CDS	hypothetical protein													1648960	1650141	-	BR1706	CDS	opgC protein, putative	ORF2			ORF4
	SmelC671	Phyllobacteriaceae	RNA27	1335463	1335561	+	NC_014923	Mesorhizobium ciceri biovar biserrulae WSM1271	765698	chromosome	1334914	1335294	+	Mesci_1279	CDS	hypothetical protein													1335747	1336280	+	Mesci_1280	CDS	protein of unknown function DUF1465	ORF7			ORF2
	SmelC671	Phyllobacteriaceae	RNA28	3136120	3136218	-	NC_002678	Mesorhizobium loti MAFF303099	266835	chromosome	3135421	3135954	-	mll3903	CDS	hypothetical protein													3136324	3136704	-	mll3904	CDS	hypothetical protein	ORF2			ORF7
	SmelC671	Phyllobacteriaceae	RNA29	2276888	2276982	+	NC_009719	Parvibaculum lavamentivorans DS-1	402881	chromosome	2276551	2276751	+	Plav_2093	CDS	hypothetical protein													2277111	2277701	+	Plav_2094	CDS	hypothetical protein	ORF8			ORF2
	SmelC671	Methylobacteriaceae	RNA30	2468265	2468365	+	NC_010725	Methylobacterium populi BJ001	441620	chromosome	2467762	2467896	-	Mpop_2310	CDS	50S ribosomal protein L34													2468542	2469075	+	Mpop_2311	CDS	protein of unknown function DUF1465	ORF9			ORF2
	SmelC671	Methylobacteriaceae	RNA31	2605554	2605655	+	NC_010172	Methylobacterium extorquens PA1	419610	chromosome	2605046	2605180	-	Mext_2353	CDS	50S ribosomal protein L34													2605829	2606362	+	Mext_2354	CDS	hypothetical protein	ORF9			ORF2
	SmelC671	Methylobacteriaceae	RNA32	2766875	2766976	+	NC_011757	Methylobacterium chloromethanicum CM4	440085	chromosome	2766370	2766504	-	Mchl_2632	CDS	50S ribosomal protein L34													2767171	2767704	+	Mchl_2633	CDS	protein of unknown function DUF1465	ORF9			ORF2
	SmelC671	Methylobacteriaceae	RNA33	3053266	3053367	+	NC_012988	Methylobacterium extorquens DM4	661410	chromosome	3053017	3053241	+	METDI3136	CDS	hypothetical protein													3053562	3054095	+	METDI3137	CDS	AraC family transcriptional regulator	ORF10			ORF2
	SmelC671	Methylobacteriaceae	RNA34	2427738	2427839	+	NC_012808	Methylobacterium extorquens AM1	272630	chromosome	2427221	2427355	-	MexAM1_META1p2356	CDS	50S ribosomal subunit protein L34													2428021	2428554	+	MexAM1_META1p2357	CDS	putative transcriptional regulator, AraC family	ORF9			ORF2
	SmelC671	Bradyrhizobiaceae	RNA35	2987530	2987630	-	NC_007406	Nitrobacter winogradskyi Nb-255	323098	chromosome	2986724	2987272	-	Nwi_2748	CDS	hypothetical protein													2987862	2988050	-	Nwi_2749	CDS	hypothetical protein	ORF2			ORF1
	SmelC671	Bradyrhizobiaceae	RNA36	1154478	1154579	+	NC_014834	Rhodopseudomonas palustris DX-1	652103	chromosome	1154162	1154353	+	Rpdx1_1081	CDS	hypothetical protein													1154772	1155281	+	Rpdx1_1082	CDS	hypothetical protein	ORF1			ORF2
	SmelC671	Bradyrhizobiaceae	RNA37	1052490	1052591	+	NC_011004	Rhodopseudomonas palustris TIE-1	395960	chromosome	1052173	1052364	+	Rpal_0986	CDS	protein of unknown function DUF1192													1052785	1053294	+	Rpal_0987	CDS	protein of unknown function DUF1465	ORF1			ORF2
37	SmelC749	Rhizobiaceae	SmelC749	3383055	3383121	-	NC_003047	Sinorhizobium meliloti 1021	266834	chromosome	3380522	3381811	+	SMc03265	CDS	putative amino acid dehydrogenase transmembrane protein													3383404	3384420	+	SMc03267	CDS	putative dipeptidase protein	ORF1			ORF2
38	SmelC775	Rhizobiaceae	SmelC775	3509659	3509802	+	NC_003047	Sinorhizobium meliloti 1021	266834	chromosome	3509102	3509512	-	SMc03844	CDS	hypothetical protein													3509841	3510659	-	SMc03845	CDS	hypothetical protein	ORF1			ORF2
	SmelC775	Rhizobiaceae	RNA1	3134887	3135031	+	CP002740	Sinorhizobium meliloti BL225C	698936	chromosome	3134330	3134740	-	SinmeB_2999	CDS	hypothetical protein													3135069	3135887	-	SinmeB_3000	CDS	protein of unknown function DUF1223	ORF1			ORF2
	SmelC775	Rhizobiaceae	RNA2	3284471	3284615	+	NC_015590	Sinorhizobium meliloti AK83	693982	chromosome 1	3283914	3284324	-	Sinme_3224	CDS	hypothetical protein													3284653	3285471	-	Sinme_3225	CDS	hypothetical protein	ORF1			ORF2
	SmelC775	Rhizobiaceae	RNA3	3228573	3228717	+	NC_009636	Sinorhizobium medicae WSM419	366394	chromosome	3228016	3228426	-	Smed_3081	CDS	hypothetical protein													3228754	3229542	-	Smed_3082	CDS	hypothetical protein	ORF1			ORF2
	SmelC775	Rhizobiaceae	RNA4	3399222	3399368	-	NC_012587	Sinorhizobium fredii NGR234	394	chromosome	3398412	3399185	+	NGR_c32390	CDS	hypothetical protein													3399514	3399921	+	NGR_c32400	CDS	hypothetical protein	ORF2			ORF1
39	SmelC776	Rhizobiaceae	SmelC776	3509729	3509830	-	NC_003047	Sinorhizobium meliloti 1021	266834	chromosome	3509102	3509512	-	SMc03844	CDS	hypothetical protein													3509841	3510659	-	SMc03845	CDS	hypothetical protein	ORF1			ORF2
	SmelC776	Rhizobiaceae	RNA1	3134956	3135058	-	CP002740	Sinorhizobium meliloti BL225C	698936	chromosome	3134330	3134740	-	SinmeB_2999	CDS	hypothetical protein													3135069	3135887	-	SinmeB_3000	CDS	protein of unknown function DUF1223	ORF1			ORF2
	SmelC776	Rhizobiaceae	RNA2	3284540	3284642	-	NC_015590	Sinorhizobium meliloti AK83	693982	chromosome 1	3283914	3284324	-	Sinme_3224	CDS	hypothetical protein													3284653	3285471	-	Sinme_3225	CDS	hypothetical protein	ORF1			ORF2
	SmelC776	Rhizobiaceae	RNA3	3228642	3228744	-	NC_009636	Sinorhizobium medicae WSM419	366394	chromosome	3228016	3228426	-	Smed_3081	CDS	hypothetical protein													3228754	3229542	-	Smed_3082	CDS	hypothetical protein	ORF1			ORF2
	SmelC776	Rhizobiaceae	RNA4	3399200	3399298	+	NC_012587	Sinorhizobium fredii NGR234	394	chromosome	3398412	3399185	+	NGR_c32390	CDS	hypothetical protein													3399514	3399921	+	NGR_c32400	CDS	hypothetical protein	ORF2			ORF1

## Sheet: Table S2
	Transcript								LEFT_FLANKING_GENE						OVERLAPPING_GENE1						OVERLAPPING_GENE2						RIGHT_FLANKING_GENE						PROTEIN_HOMOLOGY
taxonomy_group	sRNA_ID	start	stop	strand	accession	organism	tax_id	replicon_name	start	stop	strand	locus_tag	region_type	protein	start	stop	strand	locus_tag	region_type	protein	start	stop	strand	locus_tag	region_type	protein	start	stop	strand	locus_tag	region_type	protein	LF_GENE	OV_GENE1	RG_GENE
Brucellaceae	RNA1	443989	444070	+	NC_010169	Brucella suis ATCC 23445	470137	chromosome I	443760	443969	+	BSUIS_A0449	CDS	ATP/GTP-binding motif-containing protein	444067	444216	-	BSUIS_A0450	CDS	hypothetical protein							444439	444651	+	BSUIS_A0451	CDS	hypothetical protein	ORF1	ORF7	ORF2
Brucellaceae	RNA2	446219	446302	+	NC_010742	Brucella abortus S19	430066	chromosome 1	445990	446199	+	BAbS19_I04150	CDS	ATP/GTP-binding site motif A (P-loop)													446671	446883	+	BAbS19_I04160	CDS	hypothetical protein	ORF1		ORF2
Rhizobiaceae	RNA3	221238	221320	+	NC_011369	Rhizobium leguminosarum bv. trifolii WSM2304	395492	chromosome	220987	221196	+	Rleg2_0217	CDS	cold-shock DNA-binding domain protein													221642	222085	-	Rleg2_0218	CDS	transcriptional regulator	ORF1		ORF3
Rhizobiaceae	RNA4	2453550	2453641	+	NC_011369	Rhizobium leguminosarum bv. trifolii WSM2304	395492	chromosome	2453137	2453451	+	Rleg2_2391	CDS	hypothetical protein													2453673	2453975	-	Rleg2_2392	CDS	hypothetical protein	ORF4		ORF5
Rhizobiaceae	RNA5	69024	69104	+	NC_003037	Sinorhizobium meliloti 1021	266834	plasmid pSymA	68805	69014	+	SMa0126	CDS	CspA8 Cold shock family protein													69135	69515	+	SMa0128	CDS	hypothetical protein	ORF1		ORF6
Brucellaceae	RNA6	444200	444285	+	NC_007618	Brucella melitensis biovar Abortus 2308	359391	chromosome I	443972	444181	+	BAB1_0449	CDS	ATP/GTP-binding motif-containing protein	444279	444428	-	BAB1_0450	CDS	hypothetical protein							444684	444863	+	BAB1_0451	CDS	hypothetical protein	ORF1	ORF7	ORF2
Rhizobiaceae	RNA7	258805	258889	+	NC_012850	Rhizobium leguminosarum bv. trifolii WSM1325	395491	chromosome	258573	258782	+	Rleg_0246	CDS	cold-shock DNA-binding domain protein													258973	259407	-	Rleg_0247	CDS	MarR family transcriptional regulator	ORF1		ORF3
Brucellaceae	RNA8	426032	426117	+	NC_010103	Brucella canis ATCC 23365	483179	chromosome I	425903	426013	+	BCAN_A0427	CDS	cold shock protein	426111	426260	-	BCAN_A0428	CDS	hypothetical protein							426483	426695	+	BCAN_A0429	CDS	hypothetical protein	ORF1	ORF7	ORF2
Brucellaceae	RNA9	446503	446588	+	CP002459	Brucella melitensis M28	941967	chromosome 1	446275	446484	+	BM28_A0444	CDS	ATP/GTP-binding site motif A (P-loop)	446582	446731	-	BM28_A0445	CDS	conserved hypothetical protein							446954	447166	+	BM28_A0446	CDS	conserved hypothetical protein	ORF1	ORF7	ORF2
Brucellaceae	RNA10	446518	446603	+	NC_012441	Brucella melitensis ATCC 23457	546272	chromosome I	446290	446499	+	BMEA_A0454	CDS	ATP/GTP-binding domain-containing protein	446597	446746	-	BMEA_A0455	CDS	hypothetical protein							446969	447181	+	BMEA_A0456	CDS	hypothetical protein	ORF1	ORF7	ORF2
Rhizobiaceae	RNA11	398051	398130	+	CP002741	Sinorhizobium meliloti BL225C	698936	plasmid pSINMEB01	397835	398044	+	SinmeB_5466	CDS	cold-shock DNA-binding domain protein													398165	398545	+	SinmeB_5467	CDS	hypothetical protein	ORF1		ORF6
Rhizobiaceae	RNA12	643739	643822	+	NC_008380	Rhizobium leguminosarum bv. viciae 3841	216596	chromosome	643507	643716	+	RL0595	CDS	cold shock protein													643907	644410	-	RL0596	CDS	MarR family transcriptional regulator	ORF1		ORF3
Brucellaceae	RNA13	428062	428147	+	NC_013119	Brucella microti CCM 4915	568815	chromosome 1	427834	428043	+	BMI_I426	CDS	cold shock protein CspA	428141	428290	-	BMI_I427	CDS	hypothetical protein							428546	428725	+	BMI_I428	CDS	hypothetical protein	ORF1	ORF7	ORF2
Brucellaceae	RNA14	447896	447981	+	NC_006932	Brucella abortus bv. 1 str. 9-941	262698	chromosome I	447668	447877	+	BruAb1_0445	CDS	cold-shock family protein	447975	448124	-	BruAb1_0446	CDS	hypothetical protein							448347	448559	+	BruAb1_0447	CDS	hypothetical protein	ORF1	ORF7	ORF2
Rhizobiaceae	RNA15	582664	582745	+	NC_007761	Rhizobium etli CFN 42	347834	chromosome	582428	582637	+	RHE_CH00560	CDS	cold shock protein													582782	583225	-	RHE_CH00561	CDS	MarR family transcriptional regulator	ORF1		ORF3
Rhizobiaceae	RNA16	131414	131492	+	NC_003063	Agrobacterium tumefaciens str. C58	176299	chromosome linear	131190	131399	+	Atu3121	CDS	cold shock protein													131511	131801	+	Atu3122	CDS	cold shock protein	ORF1		ORF8
Rhizobiaceae	RNA17	156915	156995	-	NC_015591	Sinorhizobium meliloti AK83	693982	chromosome 3	156504	156884	-	Sinme_5433	CDS	hypothetical protein													157005	157214	-	Sinme_5434	CDS	cold-shock DNA-binding domain-containing protein	ORF6		ORF1
Phyllobacteriaceae	RNA18	3573968	3574055	-	NC_008254	Mesorhizobium sp. BNC1	266779	chromosome	3572396	3573844	+	Meso_3305	CDS	aldehyde dehydrogenase													3574060	3574269	-	Meso_3306	CDS	cold-shock DNA-binding protein family protein	ORF9		ORF1
Phyllobacteriaceae	RNA19	2046548	2046633	-	NC_008254	Mesorhizobium sp. BNC1	266779	chromosome	2043426	2045675	+	Meso_1907	CDS	twin-arginine translocation pathway signal	2046203	2046556	+	Meso_1908	CDS	hypothetical protein							2046638	2046847	-	Meso_1909	CDS	cold-shock DNA-binding protein family protein	ORF10	ORF11	ORF1
Xanthobacteraceae	RNA20	1590135	1590231	-	NC_009937	Azorhizobium caulinodans ORS 571	438753	chromosome	1589230	1590042	-	AZC_1397	CDS	exodeoxyribonuclease III protein													1590236	1590445	-	AZC_1398	CDS	cold shock protein	ORF12		ORF1
Rhizobiaceae	RNA21	41537	41622	-	NC_011366	Rhizobium leguminosarum bv. trifolii WSM2304	395492	plasmid pRLG202	41056	41277	-	Rleg2_5654	CDS	hypothetical protein													41631	41840	-	Rleg2_5655	CDS	cold-shock DNA-binding domain protein	ORF13		ORF1
Rhizobiaceae	RNA22	2055305	2055390	-	NC_009636	Sinorhizobium medicae WSM419	366394	chromosome	2055060	2055284	-	Smed_2004	CDS	hypothetical protein													2055442	2055651	-	Smed_2005	CDS	cold-shock DNA-binding domain-containing protein	ORF14		ORF1
Xanthobacteraceae	RNA23	3041716	3041800	-	NC_014217	Starkeya novella DSM 506	639283	chromosome	3041476	3041700	-	Snov_2906	CDS	hypothetical protein													3041808	3042017	-	Snov_2907	CDS	cold-shock DNA-binding domain protein	ORF15		ORF1
Brucellaceae	RNA24	1587136	1587228	-	NC_009668	Ochrobactrum anthropi ATCC 49188	439375	chromosome 2	1586007	1587065	+	Oant_4157	CDS	glutamate--ammonia ligase													1587338	1587724	-	Oant_4158	CDS	hypothetical protein	ORF16		ORF17
Rhizobiaceae	RNA25	2087481	2087563	-	NC_015590	Sinorhizobium meliloti AK83	693982	chromosome 1	2087231	2087455	-	Sinme_2087	CDS	hypothetical protein													2087612	2087821	-	Sinme_2088	CDS	cold-shock DNA-binding domain-containing protein	ORF14		ORF1
Rhizobiaceae	RNA26	114981	115067	-	NC_009621	Sinorhizobium medicae WSM419	366394	plasmid pSMED02	114474	114899	-	Smed_5161	CDS	hypothetical protein													115069	115278	-	Smed_5162	CDS	cold-shock DNA-binding domain-containing protein	ORF6		ORF1
Rhizobiaceae	RNA27	2311948	2312037	-	NC_011989	Agrobacterium vitis S4	311402	chromosome 1	2311082	2311837	-	Avi_2774	CDS	hypothetical protein													2312094	2313770	-	Avi_2775	CDS	methyl-accepting chemotaxis protein	ORF18		ORF19
Phyllobacteriaceae	RNA28	2491836	2491912	-	NC_009719	Parvibaculum lavamentivorans DS-1	402881	chromosome	2490453	2491502	-	Plav_2318	CDS	type 11 methyltransferase	2491581	2491874	-	Plav_2319	CDS	hypothetical protein							2492031	2493149	-	Plav_2320	CDS	ThiJ/PfpI domain-containing protein	ORF20	ORF21	ORF22
Rhizobiaceae	RNA29|SmelC521	2272450	2272532	-	NC_003047	Sinorhizobium meliloti 1021	266834	chromosome	2272200	2272424	-	SMc01427	CDS	hypothetical protein													2272581	2272790	-	SMc01428	CDS	cold shock transcription regulator protein	ORF14		ORF1
Rhizobiaceae	RNA30	15225	15310	-	NC_012858	Rhizobium leguminosarum bv. trifolii WSM1325	395491	plasmid pR132502	14968	15192	-	Rleg_6590	CDS	hypothetical protein													15321	15530	-	Rleg_6591	CDS	cold-shock DNA-binding domain protein	ORF13		ORF1
Brucellaceae	RNA31	1556775	1556856	-	NC_003317	Brucella melitensis bv. 1 str. 16M	224914	chromosome I	1556194	1556406	-	BMEI1509	CDS	hypothetical protein													1556876	1557085	-	BMEI1510	CDS	cold shock protein CSPA	ORF2		ORF1
Rhizobiaceae	RNA32	2873561	2873648	-	NC_011985	Agrobacterium radiobacter K84	311403	chromosome 1	2872791	2873246	-	Arad_3589	CDS	hypothetical protein													2873655	2873864	-	Arad_3590	CDS	cold shock protein	ORF23		ORF1
Rhizobiaceae	RNA33	1987203	1987288	-	CP002740	Sinorhizobium meliloti BL225C	698936	chromosome	1986959	1987183	-	SinmeB_1931	CDS	hypothetical protein													1987340	1987549	-	SinmeB_1932	CDS	cold-shock DNA-binding domain protein	ORF14		ORF1

## Sheet: Table S3
Accession	tax_id	organism	replicon name	taxonomy_group
NC_003047.1	266834	Sinorhizobium meliloti 1021	chromosome	Rhizobiaceae
NC_003037.1	266834	Sinorhizobium meliloti 1021	plasmid pSymA	Rhizobiaceae
NC_003078.1	266834	Sinorhizobium meliloti 1021	plasmid pSymB	Rhizobiaceae
NC_015590.1	693982	Sinorhizobium meliloti AK83	chromosome 1	Rhizobiaceae
NC_015596.1	693982	Sinorhizobium meliloti AK83	chromosome 2	Rhizobiaceae
NC_015591.1	693982	Sinorhizobium meliloti AK83	chromosome 3	Rhizobiaceae
NC_015597.1	693982	Sinorhizobium meliloti AK83	plasmid pSINME01	Rhizobiaceae
NC_015592.1	693982	Sinorhizobium meliloti AK83	plasmid pSINME02	Rhizobiaceae
CP002740.1	698936	Sinorhizobium meliloti BL225C	chromosome	Rhizobiaceae
CP002741.1	698936	Sinorhizobium meliloti BL225C	plasmid pSINMEB01	Rhizobiaceae
CP002742.1	698936	Sinorhizobium meliloti BL225C	plasmid pSINMEB02	Rhizobiaceae
NC_012587.1	394	Sinorhizobium fredii NGR234	chromosome	Rhizobiaceae
NC_000914.2	394	Sinorhizobium fredii NGR234	plasmid pNGR234a	Rhizobiaceae
NC_012586.1	394	Sinorhizobium fredii NGR234	plasmid pNGR234b	Rhizobiaceae
NC_009636.1	366394	Sinorhizobium medicae WSM419	chromosome	Rhizobiaceae
NC_009620.1	366394	Sinorhizobium medicae WSM419	plasmid pSMED01	Rhizobiaceae
NC_009621.1	366394	Sinorhizobium medicae WSM419	plasmid pSMED02	Rhizobiaceae
NC_009622.1	366394	Sinorhizobium medicae WSM419	plasmid pSMED03	Rhizobiaceae
NC_011985.1	311403	Agrobacterium radiobacter K84	chromosome 1	Rhizobiaceae
NC_011983.1	311403	Agrobacterium radiobacter K84	chromosome 2	Rhizobiaceae
NC_011994.1	311403	Agrobacterium radiobacter K84	plasmid pAgK84	Rhizobiaceae
NC_011990.1	311403	Agrobacterium radiobacter K84	plasmid pAtK84b	Rhizobiaceae
NC_011987.1	311403	Agrobacterium radiobacter K84	plasmid pAtK84c	Rhizobiaceae
NC_002575.1	359	Agrobacterium rhizogenes	MAFF03-01724 plasmid pRi1724	Rhizobiaceae
NC_010841.1	359	Agrobacterium rhizogenes	plasmid pRi2659	Rhizobiaceae
NC_015183.1	861208	Agrobacterium sp. H13-3	chromosome	Rhizobiaceae
NC_015508.1	861208	Agrobacterium sp. H13-3	chromosome linear	Rhizobiaceae
NC_015184.1	861208	Agrobacterium sp. H13-3	plasmid pAspH13-3a	Rhizobiaceae
NC_003062.2	176299	Agrobacterium tumefaciens str. C58	chromosome circular	Rhizobiaceae
NC_003063.2	176299	Agrobacterium tumefaciens str. C58	chromosome linear	Rhizobiaceae
NC_003064.2	176299	Agrobacterium tumefaciens str. C58	plasmid At	Rhizobiaceae
NC_003065.3	176299	Agrobacterium tumefaciens str. C58	plasmid Ti	Rhizobiaceae
NC_011989.1	311402	Agrobacterium vitis S4	chromosome 1	Rhizobiaceae
NC_011988.1	311402	Agrobacterium vitis S4	chromosome 2	Rhizobiaceae
NC_011986.1	311402	Agrobacterium vitis S4	plasmid pAtS4a	Rhizobiaceae
NC_011991.1	311402	Agrobacterium vitis S4	plasmid pAtS4b	Rhizobiaceae
NC_011984.1	311402	Agrobacterium vitis S4	plasmid pAtS4c	Rhizobiaceae
NC_011981.1	311402	Agrobacterium vitis S4	plasmid pAtS4e	Rhizobiaceae
NC_011982.1	311402	Agrobacterium vitis S4	plasmid pTiS4	Rhizobiaceae
NC_012985.2	537021	Candidatus Liberibacter asiaticus str. psy62	chromosome	Rhizobiaceae
NC_014774.1	658172	Candidatus Liberibacter solanacearum CLso-ZC1	chromosome	Rhizobiaceae
NC_007761.1	347834	Rhizobium etli CFN 42	chromosome	Rhizobiaceae
NC_007762.1	347834	Rhizobium etli CFN 42	plasmid p42a	Rhizobiaceae
NC_007763.1	347834	Rhizobium etli CFN 42	plasmid p42b	Rhizobiaceae
NC_007764.1	347834	Rhizobium etli CFN 42	plasmid p42c	Rhizobiaceae
NC_007765.1	347834	Rhizobium etli CFN 42	plasmid p42e	Rhizobiaceae
NC_007766.1	347834	Rhizobium etli CFN 42	plasmid p42f	Rhizobiaceae
NC_004041.2	347834	Rhizobium etli CFN 42	plasmid symbiotic plasmid p42d	Rhizobiaceae
NC_010994.1	491916	Rhizobium etli CIAT 652	chromosome	Rhizobiaceae
NC_010998.1	491916	Rhizobium etli CIAT 652	plasmid pA	Rhizobiaceae
NC_010996.1	491916	Rhizobium etli CIAT 652	plasmid pB	Rhizobiaceae
NC_010997.1	491916	Rhizobium etli CIAT 652	plasmid pC	Rhizobiaceae
NC_012850.1	395491	Rhizobium leguminosarum bv. trifolii WSM1325	chromosome	Rhizobiaceae
NC_012848.1	395491	Rhizobium leguminosarum bv. trifolii WSM1325	plasmid pR132501	Rhizobiaceae
NC_012858.1	395491	Rhizobium leguminosarum bv. trifolii WSM1325	plasmid pR132502	Rhizobiaceae
NC_012853.1	395491	Rhizobium leguminosarum bv. trifolii WSM1325	plasmid pR132503	Rhizobiaceae
NC_012852.1	395491	Rhizobium leguminosarum bv. trifolii WSM1325	plasmid pR132504	Rhizobiaceae
NC_012854.1	395491	Rhizobium leguminosarum bv. trifolii WSM1325	plasmid pR132505	Rhizobiaceae
NC_011369.1	395492	Rhizobium leguminosarum bv. trifolii WSM2304	chromosome	Rhizobiaceae
NC_011368.1	395492	Rhizobium leguminosarum bv. trifolii WSM2304	plasmid pRLG201	Rhizobiaceae
NC_011366.1	395492	Rhizobium leguminosarum bv. trifolii WSM2304	plasmid pRLG202	Rhizobiaceae
NC_011370.1	395492	Rhizobium leguminosarum bv. trifolii WSM2304	plasmid pRLG203	Rhizobiaceae
NC_011371.1	395492	Rhizobium leguminosarum bv. trifolii WSM2304	plasmid pRLG204	Rhizobiaceae
NC_008380.1	216596	Rhizobium leguminosarum bv. viciae 3841	chromosome	Rhizobiaceae
NC_008381.1	216596	Rhizobium leguminosarum bv. viciae 3841	plasmid pRL10	Rhizobiaceae
NC_008384.1	216596	Rhizobium leguminosarum bv. viciae 3841	plasmid pRL11	Rhizobiaceae
NC_008378.1	216596	Rhizobium leguminosarum bv. viciae 3841	plasmid pRL12	Rhizobiaceae
NC_008382.1	216596	Rhizobium leguminosarum bv. viciae 3841	plasmid pRL7	Rhizobiaceae
NC_008383.1	216596	Rhizobium leguminosarum bv. viciae 3841	plasmid pRL8	Rhizobiaceae
NC_008379.1	216596	Rhizobium leguminosarum bv. viciae 3841	plasmid pRL9	Rhizobiaceae
NC_008783.1	360095	Bartonella bacilliformis KC583	chromosome	Bartonellaceae
NC_014932.1	696125	Bartonella clarridgeiae 73	chromosome	Bartonellaceae
NC_012846.1	634504	Bartonella grahamii as4aup	chromosome	Bartonellaceae
NC_012847.1	634504	Bartonella grahamii as4aup	plasmid pBGR3	Bartonellaceae
NC_005956.1	283166	Bartonella henselae str. Houston-1	chromosome	Bartonellaceae
NC_005955.1	283165	Bartonella quintana str. Toulouse	chromosome	Bartonellaceae
NC_010161.1	382640	Bartonella tribocorum CIP 105476	chromosome	Bartonellaceae
NC_010160.1	382640	Bartonella tribocorum CIP 105476	plasmid pBT01	Bartonellaceae
NC_010581.1	395963	Beijerinckia indica subsp. indica ATCC 9039	chromosome	Beijerinckiaceae
NC_010580.1	395963	Beijerinckia indica subsp. indica ATCC 9039	plasmid pBIND01	Beijerinckiaceae
NC_010578.1	395963	Beijerinckia indica subsp. indica ATCC 9039	plasmid pBIND02	Beijerinckiaceae
NC_011666.1	395965	Methylocella silvestris BL2	chromosome	Beijerinckiaceae
NC_004463.1	224911	Bradyrhizobium japonicum USDA 110	chromosome	Bradyrhizobiaceae
NC_009485.1	288000	Bradyrhizobium sp. BTAi1	chromosome	Bradyrhizobiaceae
NC_009475.1	288000	Bradyrhizobium sp. BTAi1	plasmid pBBta01	Bradyrhizobiaceae
NC_009445.1	114615	Bradyrhizobium sp. ORS278	chromosome	Bradyrhizobiaceae
NC_007964.1	323097	Nitrobacter hamburgensis X14	chromosome	Bradyrhizobiaceae
NC_007959.1	323097	Nitrobacter hamburgensis X14	plasmid 1	Bradyrhizobiaceae
NC_007960.1	323097	Nitrobacter hamburgensis X14	plasmid 2	Bradyrhizobiaceae
NC_007961.1	323097	Nitrobacter hamburgensis X14	plasmid 3	Bradyrhizobiaceae
NC_007406.1	323098	Nitrobacter winogradskyi Nb-255	chromosome	Bradyrhizobiaceae
NC_011386.1	504832	Oligotropha carboxidovorans OM5	chromosome	Bradyrhizobiaceae
NC_008435.1	316055	Rhodopseudomonas palustris BisA53	chromosome	Bradyrhizobiaceae
NC_007925.1	316056	Rhodopseudomonas palustris BisB18	chromosome	Bradyrhizobiaceae
NC_007958.1	316057	Rhodopseudomonas palustris BisB5	chromosome	Bradyrhizobiaceae
NC_005296.1	258594	Rhodopseudomonas palustris CGA009	chromosome	Bradyrhizobiaceae
NC_005297.1	258594	Rhodopseudomonas palustris CGA009	plasmid pRPA	Bradyrhizobiaceae
NC_014834.1	652103	Rhodopseudomonas palustris DX-1	chromosome	Bradyrhizobiaceae
NC_007778.1	316058	Rhodopseudomonas palustris HaA2	chromosome	Bradyrhizobiaceae
NC_011004.1	395960	Rhodopseudomonas palustris TIE-1	chromosome	Bradyrhizobiaceae
NC_010742.1	430066	Brucella abortus S19	chromosome 1	Brucellaceae
NC_010740.1	430066	Brucella abortus S19	chromosome 2	Brucellaceae
NC_006932.1	262698	Brucella abortus bv. 1 str. 9-941	chromosome I	Brucellaceae
NC_006933.1	262698	Brucella abortus bv. 1 str. 9-941	chromosome II	Brucellaceae
NC_010103.1	483179	Brucella canis ATCC 23365	chromosome I	Brucellaceae
NC_010104.1	483179	Brucella canis ATCC 23365	chromosome II	Brucellaceae
NC_012441.1	546272	Brucella melitensis ATCC 23457	chromosome I	Brucellaceae
NC_012442.1	546272	Brucella melitensis ATCC 23457	chromosome II	Brucellaceae
CP002459.1	941967	Brucella melitensis M28	chromosome 1	Brucellaceae
CP002460.1	941967	Brucella melitensis M28	chromosome 2	Brucellaceae
NC_007618.1	359391	Brucella melitensis biovar Abortus 2308	chromosome I	Brucellaceae
NC_007624.1	359391	Brucella melitensis biovar Abortus 2308	chromosome II	Brucellaceae
NC_003317.1	224914	Brucella melitensis bv. 1 str. 16M	chromosome I	Brucellaceae
NC_003318.1	224914	Brucella melitensis bv. 1 str. 16M	chromosome II	Brucellaceae
NC_013119.1	568815	Brucella microti CCM 4915	chromosome 1	Brucellaceae
NC_013118.1	568815	Brucella microti CCM 4915	chromosome 2	Brucellaceae
NC_009505.1	444178	Brucella ovis ATCC 25840	chromosome I	Brucellaceae
NC_009504.1	444178	Brucella ovis ATCC 25840	chromosome II	Brucellaceae
NC_004310.3	204722	Brucella suis 1330	chromosome I	Brucellaceae
NC_004311.2	204722	Brucella suis 1330	chromosome II	Brucellaceae
NC_010169.1	470137	Brucella suis ATCC 23445	chromosome I	Brucellaceae
NC_010167.1	470137	Brucella suis ATCC 23445	chromosome II	Brucellaceae
NC_009667.1	439375	Ochrobactrum anthropi ATCC 49188	chromosome 1	Brucellaceae
NC_009668.1	439375	Ochrobactrum anthropi ATCC 49188	chromosome 2	Brucellaceae
NC_009669.1	439375	Ochrobactrum anthropi ATCC 49188	plasmid pOANT01	Brucellaceae
NC_009670.1	439375	Ochrobactrum anthropi ATCC 49188	plasmid pOANT02	Brucellaceae
NC_009671.1	439375	Ochrobactrum anthropi ATCC 49188	plasmid pOANT03	Brucellaceae
NC_009672.1	439375	Ochrobactrum anthropi ATCC 49188	plasmid pOANT04	Brucellaceae
NC_014313.1	582899	Hyphomicrobium denitrificans ATCC 51888	chromosome	Hyphomicrobiaceae
NC_014664.1	648757	Rhodomicrobium vannielii ATCC 17100	chromosome	Hyphomicrobiaceae
NC_011757.1	440085	Methylobacterium chloromethanicum CM4	chromosome	Methylobacteriaceae
NC_011758.1	440085	Methylobacterium chloromethanicum CM4	plasmid pMCHL01	Methylobacteriaceae
NC_011760.1	440085	Methylobacterium chloromethanicum CM4	plasmid pMCHL02	Methylobacteriaceae
NC_012808.1	272630	Methylobacterium extorquens AM1	chromosome	Methylobacteriaceae
NC_012811.1	272630	Methylobacterium extorquens AM1	plasmid megaplasmid	Methylobacteriaceae
NC_012807.1	272630	Methylobacterium extorquens AM1	plasmid p1META1	Methylobacteriaceae
NC_012809.1	272630	Methylobacterium extorquens AM1	plasmid p2META1	Methylobacteriaceae
NC_012810.1	272630	Methylobacterium extorquens AM1	plasmid p3META1	Methylobacteriaceae
NC_012988.1	661410	Methylobacterium extorquens DM4	chromosome	Methylobacteriaceae
NC_012987.1	661410	Methylobacterium extorquens DM4	plasmid p1METDI	Methylobacteriaceae
NC_012989.1	661410	Methylobacterium extorquens DM4	plasmid p2METDI	Methylobacteriaceae
NC_010172.1	419610	Methylobacterium extorquens PA1	chromosome	Methylobacteriaceae
NC_011894.1	460265	Methylobacterium nodulans ORS 2060	chromosome	Methylobacteriaceae
NC_011892.1	460265	Methylobacterium nodulans ORS 2060	plasmid pMNOD01	Methylobacteriaceae
NC_011887.1	460265	Methylobacterium nodulans ORS 2060	plasmid pMNOD02	Methylobacteriaceae
NC_011893.1	460265	Methylobacterium nodulans ORS 2060	plasmid pMNOD03	Methylobacteriaceae
NC_011895.1	460265	Methylobacterium nodulans ORS 2060	plasmid pMNOD04	Methylobacteriaceae
NC_011888.1	460265	Methylobacterium nodulans ORS 2060	plasmid pMNOD05	Methylobacteriaceae
NC_011889.1	460265	Methylobacterium nodulans ORS 2060	plasmid pMNOD06	Methylobacteriaceae
NC_011890.1	460265	Methylobacterium nodulans ORS 2060	plasmid pMNOD07	Methylobacteriaceae
NC_010725.1	441620	Methylobacterium populi BJ001	chromosome	Methylobacteriaceae
NC_010727.1	441620	Methylobacterium populi BJ001	plasmid pMPOP01	Methylobacteriaceae
NC_010721.1	441620	Methylobacterium populi BJ001	plasmid pMPOP02	Methylobacteriaceae
NC_010505.1	426355	Methylobacterium radiotolerans JCM 2831	chromosome	Methylobacteriaceae
NC_010510.1	426355	Methylobacterium radiotolerans JCM 2831	plasmid pMRAD01	Methylobacteriaceae
NC_010509.1	426355	Methylobacterium radiotolerans JCM 2831	plasmid pMRAD02	Methylobacteriaceae
NC_010514.1	426355	Methylobacterium radiotolerans JCM 2831	plasmid pMRAD03	Methylobacteriaceae
NC_010517.1	426355	Methylobacterium radiotolerans JCM 2831	plasmid pMRAD04	Methylobacteriaceae
NC_010518.1	426355	Methylobacterium radiotolerans JCM 2831	plasmid pMRAD05	Methylobacteriaceae
NC_010502.1	426355	Methylobacterium radiotolerans JCM 2831	plasmid pMRAD06	Methylobacteriaceae
NC_010504.1	426355	Methylobacterium radiotolerans JCM 2831	plasmid pMRAD07	Methylobacteriaceae
NC_010507.1	426355	Methylobacterium radiotolerans JCM 2831	plasmid pMRAD08	Methylobacteriaceae
NC_010511.1	426117	Methylobacterium sp. 4-46	chromosome	Methylobacteriaceae
NC_010373.1	426117	Methylobacterium sp. 4-46	plasmid pM44601	Methylobacteriaceae
NC_010374.1	426117	Methylobacterium sp. 4-46	plasmid pM44602	Methylobacteriaceae
NC_008254.1	266779	Chelativorans sp. BNC1	chromosome	Phyllobacteriaceae
NC_008242.1	266779	Chelativorans sp. BNC1	plasmid 1	Phyllobacteriaceae
NC_008243.1	266779	Chelativorans sp. BNC1	plasmid 2	Phyllobacteriaceae
NC_008244.1	266779	Chelativorans sp. BNC1	plasmid 3	Phyllobacteriaceae
NC_014923.1	765698	Mesorhizobium ciceri biovar biserrulae WSM1271	chromosome	Phyllobacteriaceae
NC_014918.1	765698	Mesorhizobium ciceri biovar biserrulae WSM1271	plasmid pMESCI01	Phyllobacteriaceae
NC_002678.2	266835	Mesorhizobium loti MAFF303099	chromosome	Phyllobacteriaceae
NC_002679.1	266835	Mesorhizobium loti MAFF303099	plasmid pMLa	Phyllobacteriaceae
NC_002682.1	266835	Mesorhizobium loti MAFF303099	plasmid pMLb	Phyllobacteriaceae
NC_009719.1	402881	Parvibaculum lavamentivorans DS-1	chromosome	Phyllobacteriaceae
NC_012960.1	573234	Candidatus Hodgkinia cicadicola Dsem	chromosome	Rhizobiales
NC_009937.1	438753	Azorhizobium caulinodans ORS 571	chromosome	Xanthobacteraceae
NC_014217.1	639283	Starkeya novella DSM 506	chromosome	Xanthobacteraceae
NC_009720.1	78245	Xanthobacter autotrophicus Py2	chromosome	Xanthobacteraceae
NC_009717.1	78245	Xanthobacter autotrophicus Py2	plasmid pXAUT01	Xanthobacteraceae
